# Supplementary material for: Effect of virtual reality simulation training on the response capability of public health emergency reserve nurses in China: a quasiexperimental study
Source: PubMed Central journal article supplement — BMJ Open. 2021 Sep 22;11(9):e048611. doi: 10.1136/bmjopen-2021-048611 (PMC8460527; doi:10.1136/bmjopen-2021-048611), 2021-09-22
Supplement: bmjopen-2021-048611.draft_revisions.pdf [file bmjopen-2021-048611.draft_revisions.pdf]

# BMJ Open

BMJ Open is committed to open peer review. As part of this commitment we make the peer review history of every article we publish publicly available.

When an article is published we post the peer reviewers' comments and the authors' responses online. We also post the versions of the paper that were used during peer review. These are the versions that the peer review comments apply to.

The versions of the paper that follow are the versions that were submitted during the peer review process. They are not the versions of record or the final published versions. They should not be cited or distributed as the published version of this manuscript.

BMJ Open is an open access journal and the full, final, typeset and author-corrected version of record of the manuscript is available on our site with no access controls, subscription charges or pay-per-view fees (<http://bmjopen.bmj.com>).

If you have any questions on BMJ Open's open peer review process please email [info.bmjopen@bmj.com](mailto:info.bmjopen@bmj.com)

# BMJ Open

**-Application of virtual simulation technology: a novel training mode on public health emergencies for emergency reserve nurses**

|                               |                                                                                                                                                                                                                                                                                                                                                                                                                                                                                                                                                                                                                                                                                               |
|-------------------------------|-----------------------------------------------------------------------------------------------------------------------------------------------------------------------------------------------------------------------------------------------------------------------------------------------------------------------------------------------------------------------------------------------------------------------------------------------------------------------------------------------------------------------------------------------------------------------------------------------------------------------------------------------------------------------------------------------|
| Journal:                      | <i>BMJ Open</i>                                                                                                                                                                                                                                                                                                                                                                                                                                                                                                                                                                                                                                                                               |
| Manuscript ID                 | bmjopen-2021-048611                                                                                                                                                                                                                                                                                                                                                                                                                                                                                                                                                                                                                                                                           |
| Article Type:                 | Original research                                                                                                                                                                                                                                                                                                                                                                                                                                                                                                                                                                                                                                                                             |
| Date Submitted by the Author: | 01-Jan-2021                                                                                                                                                                                                                                                                                                                                                                                                                                                                                                                                                                                                                                                                                   |
| Complete List of Authors:     | ZHANG, DANDAN; Xi'an Jiaotong University Health Science Center, School of Nursing; University of South China Affiliated Nanhua Hospital, Institute of Clinical Research,<br>LIAO, Hongwu; University of South China Affiliated Nanhua Hospital<br>YANG, Wenren; University of South China Affiliated Nanhua Hospital<br>HE, Pingping; University of South China, School of Nursing<br>WANG, Dongmei; University of South China Affiliated Nanhua Hospital<br>CHEN, Yongjun; University of South China Affiliated Nanhua Hospital<br>YANG, Wei; University of South China Affiliated Nanhua Hospital<br>ZHANG, Yin-Ping ; Xi'an Jiaotong University , School of Nursing, Health Science Center |
| Keywords:                     | Public health < INFECTIOUS DISEASES, INFECTIOUS DISEASES, Health & safety < HEALTH SERVICES ADMINISTRATION & MANAGEMENT, EDUCATION & TRAINING (see Medical Education & Training)                                                                                                                                                                                                                                                                                                                                                                                                                                                                                                              |
|                               |                                                                                                                                                                                                                                                                                                                                                                                                                                                                                                                                                                                                                                                                                               |

SCHOLARONE™  
Manuscripts

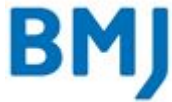

I, the Submitting Author has the right to grant and does grant on behalf of all authors of the Work (as defined in the below author licence), an exclusive licence and/or a non-exclusive licence for contributions from authors who are: i) UK Crown employees; ii) where BMJ has agreed a CC-BY licence shall apply, and/or iii) in accordance with the terms applicable for US Federal Government officers or employees acting as part of their official duties; on a worldwide, perpetual, irrevocable, royalty-free basis to BMJ Publishing Group Ltd ("BMJ") its licensees and where the relevant Journal is co-owned by BMJ to the co-owners of the Journal, to publish the Work in this journal and any other BMJ products and to exploit all rights, as set out in our [licence](#).

The Submitting Author accepts and understands that any supply made under these terms is made by BMJ to the Submitting Author unless you are acting as an employee on behalf of your employer or a postgraduate student of an affiliated institution which is paying any applicable article publishing charge ("APC") for Open Access articles. Where the Submitting Author wishes to make the Work available on an Open Access basis (and intends to pay the relevant APC), the terms of reuse of such Open Access shall be governed by a Creative Commons licence – details of these licences and which [Creative Commons](#) licence will apply to this Work are set out in our licence referred to above.

Other than as permitted in any relevant BMJ Author's Self Archiving Policies, I confirm this Work has not been accepted for publication elsewhere, is not being considered for publication elsewhere and does not duplicate material already published. I confirm all authors consent to publication of this Work and authorise the granting of this licence.

1  
2  
3  
4 **-Title:**  
5  
6

7 **Application of virtual simulation technology: a novel training mode**  
8 **on public health emergencies for emergency reserve nurses**  
9

10  
11  
12  
13  
14  
15  
16 **Authors:**  
17

18  
19  
20 Dandan ZHANG<sup>1,2</sup>, Hongwu LIAO<sup>2</sup>, Wenren YANG<sup>2</sup>, Pingping HE<sup>3</sup>, Dongmei  
21 WANG<sup>2</sup>, Yongjun CHEN<sup>2</sup>, Wei YANG<sup>2</sup>, Yin-Ping Zhang<sup>1\*</sup>  
22  
23

24  
25 1. *School of Nursing, Health science center, Xi'an Jiaotong University, Xi'an, China*  
26

27  
28 2. *Institute of Clinical Research, Affiliated Nanhua Hospital, University of South China,*  
29 *Hengyang, China*  
30

31  
32 3. *School of Nursing, University of South China, Hengyang, China*  
33  
34  
35  
36  
37  
38

39 ***§ Address correspondence to:***  
40

41  
42 Yin-Ping Zhang, PhD  
43

44  
45 School of Nursing, Xi'an Jiaotong University Health Science Center  
46

47  
48 No.76, Yanta West Road, Xi'an, Shaanxi, 710061, China  
49

50  
51  
52 Email: [cathyzh@mail.xjtu.edu.cn](mailto:cathyzh@mail.xjtu.edu.cn)  
53

54  
55  
56 Tel: +86(29) 8265 7015

57 Fax: +86(29) 8265 7015  
58  
59  
60

### Authors' Contributions

Dandan ZHANG and Hongwu LIAO contributed equally to this work.

Dandan ZHANG and Hongwu LIAO are joint first authors.

**Keywords:** Disaster; nursing; virtual simulation; emergency; public health; respiratory infectious disease; epidemic situation of COVID-19

**The total number of words:** 3428

## ABSTRACT

**Objective:** To develop and evaluate a virtual simulation training program to improve the emergency reserve nurses' ability to respond to disasters such as public health emergencies.

**Methods:** A total of 120 emergency reserve nurses were enrolled and divided into control group and experimental group, with 60 in each group, by random number table method, for a 3-month training. The nurses in the control group received conventional training, while those in the experimental group received virtual simulation training combined with offline training on the basis of the intervention of the control group. Before and after intervention, the nurses of the two groups were evaluated on the knowledge and operation skills related to fulminating respiratory infectious diseases, as well as emergency rescue ability; and they were assessed by a disaster preparation questionnaire, the results of which were compared, and the influencing factors were analyzed.

**Results:** After intervention, the scores of related knowledges, emergency rescue ability, and disaster preparation in the experimental group showed significantly increased ( $P < 0.01$ ). The score of operation skills in the control group increased higher than that in the experimental group ( $P < 0.01$ ). The score of post-disaster recovery ability in two groups showed no significant difference ( $P > 0.05$ ).

**Conclusion:** Virtual simulation training combined with offline practical training can improve the disaster preparation of reserve nurses than conventional training. This novel training mode on public health emergencies for nurses deserves further exploration and popularization.

## SUMMARY BOX

### 1. What is already known about this subject:

Since December 2019, COVID-19 has widespread globally as a pandemic and seriously threatened the health of the world, which has imposed high requirements for the emergency rescue ability of medical staff. As one of the main forces of the rescue team, nurses play a significant role in disaster response.

According to the investigations conducted during the COVID-19 epidemic period in the Beijing and Jilin medical teams to support Wuhan, Hubei province and the

1  
2  
3 designated hospitals for treating COVID-19 in Beijing, Jilin province, and other places,  
4 the nurses had inadequate ability to respond to disasters such as public health  
5 emergencies. It, therefore, is necessary to improve nurses' ability on disaster  
6 preparation through practical training and simulation exercises.  
7  
8  
9

10  
11  
12 As infectious diseases are highly contagious and harmful and its outbreak is unexpected  
13 and fulminant, it is difficult to carry out traditional on-the-spot teaching.  
14  
15  
16

17  
18  
19 Virtual simulation training has been widely used in school and hospital for induction  
20 training and teaching, as it can provide a lifelike, intelligent, interactive, independent  
21 and open learning environment, which is conducive to cultivate students' critical  
22 thinking and clinical decision-making ability. However, there is few virtual simulation  
23 program providing nursing professional training on responding to public health  
24 emergencies, especially severe respiratory infectious diseases.  
25  
26  
27  
28  
29  
30  
31

## 32 **2.What are the new findings:**

33  
34 In this study, we introduced virtual simulation teaching technology and 3D virtual  
35 hospital real scene and the real cases of COVID-19 into emergency reserve nurses'  
36 training. The virtual environment simulated the real scene of isolation ward, COVID-  
37 19 patients' medical conditions, e.g., discomfort reactions, disease development,  
38 psychological changes, etc., and diagnosis and treatment, nursing care, standard  
39 operation procedures (SOPs) of disinfection and isolation, precautions against  
40 medication reactions. The trainees can conduct operations and practices in the  
41 immersive training environment, quickly grasp the essentials, adapt to the work context  
42 and improve their emergency rescue ability and comprehensive quality.  
43  
44  
45  
46  
47  
48  
49  
50

51 We compared conventional training with virtual simulation training combined with  
52 offline training, and found the latter one can significantly improve the disaster  
53 preparation of reserve nurses than the former one. Moreover, virtual simulation  
54 teaching combined with offline training has more advantages in the mastery of  
55 theoretical knowledge, and improving emergency rescue ability, disaster response and  
56 preparation ability.  
57  
58  
59  
60

### 3.Strengths and limitations of this study:

(1) the main strengths in our study: ① This study can provide the basis for the development of a scientific and reasonable emergency nursing training mode and the establishment emergency reserve nursing team.②Virtual simulation teaching combined with offline training, as a novel method, can be used in medical institution in emergency training for public health emergencies, preparing for an efficient and orderly emergency rescue in dealing with public health emergencies.

(2) limitations : ①The sample size of the study is small, and the subjects all come from only one hospital, so the reference significance of the analysis results on factors affecting disaster preparedness is limited. ② Due to the limitation of resources, the virtual scene of make shift hospital is not constructed in the virtual training program, which will be added in the future study. ③ The training related to post-disaster care and PTSD was not paid enough attention, which will be improved in the future.



## INTRODUCTION

Since December 2019, COVID-19 has widespread globally as the severest pandemic in the past hundred years and seriously threatened human health. As of August 10, 2020, COVID-19, caused by SARS-CoV-2, resulted in more than 730 000 deaths in the worldwide.<sup>[1]</sup> Due to the sudden outbreak, rapid spread and no specific drug treatment, the emergency response mechanism of major public health emergencies around the world has been facing great challenges, which also called for competent emergency rescue ability of medical personnel.

As one of the essential forces in a rescue team, nurses play a significant role in disaster response.<sup>[2-3]</sup> At present, there is no disaster specialist nurses in China. Generally, the teams involved in emergency rescue were drafted from various hospitals. Investigations conducted during the epidemic of COVID-19 in China showed that the front-line clinical nurses sent to Wuhan, Hubei province and those worked in designated hospitals in Beijing, Jilin, and other places had a low-to-medium level of disaster preparation.<sup>[4-6]</sup> These emergency nurses only had participated in short-term emergency relief training or drills, and thus they lacked emergency response ability in practical work and had great psychological pressure.<sup>[7]</sup> According to the retrospective survey of nurses' disaster preparation involved SARS carried out 5 years after the outbreak of pandemic,<sup>[8]</sup> and surveys in the United States, Asia-Pacific, and other places,<sup>[9-13]</sup> those nurses' disaster preparation was at a low-middle or poor level, and they nurses cannot deal with disasters effectively. Therefore, it is of great importance now to figure out how to enhance the training of disaster nursing so as to strengthen the comprehensive ability of emergency reserve nurses in response to public health emergencies.

At present, researchers have proposed emergency drill, disaster simulation, and rescue drill, desktop maneuvers and other ways to help nurses gain more disaster relief experience,<sup>[7, 14-15]</sup> and also explored nursing students' training on emergency rescue by simulation teaching, disaster scenario reproduction and obstacle setting training, network distance education, and so on.<sup>[16-18]</sup> However, these studies lack long-term follow-up results, and the organization of simulated emergency drills is costly and inconvenient for students to practice repeatedly. On another hand, the outbreak of acute infectious disease is rare in chance and with some unusual physical signs, high infectivity and harmfulness, so it is difficult to realize on-site teaching. In order to cope with the sudden outbreak of infectious diseases, many medical

1  
2  
3 institutions regularly organize medical personnel to conduct drills according to the  
4 emergency plans. As the drill scenario is set in advance and all the patients role-  
5 played, these drills cannot simulate the real situation and provide on-site experience,  
6 so the trainees complain about not having sufficient ability in the face of sudden  
7 situation.<sup>[9, 19]</sup> Especially, during this pandemic of COVID-19, there were many  
8 problems emerged, e.g., insufficient emergency ability and high psychological  
9 pressure.<sup>[4-6]</sup>  
10  
11  
12  
13

14  
15 Virtual simulation training has been widely used in school teaching and hospital  
16 induction training for its advantages of life-like simulation, intelligence, interaction,  
17 independence, and openness.<sup>[20]</sup> It is helpful for cultivating students' critical thinking  
18 and clinical decision-making ability. During the training, the trainees can log in the  
19 system with different roles, which can realize the training of different professional  
20 skills, teamwork and real-time interaction, and also facilitate the medical students of  
21 different majors to form a team to provide treatment and nursing care for patients.<sup>[7, 21]</sup>  
22 In China, the virtual simulation program for training infectious diseases nursing  
23 mainly includes the training of common infectious diseases nursing thinking and the  
24 experimental program of layout design of infectious diseases zone, but these programs  
25 are seldomly involved in the knowledge of new infectious disease. The virtual  
26 simulation programs related to emergency treatment of respiratory infectious diseases,  
27 e.g., avian influenza, plague, tuberculosis, mainly focus on how to conduct epidemic  
28 investigation, treatment, reporting, sterilization, etc.<sup>[22]</sup> are usually designed for  
29 preventive medicine and public health students. However, there is no virtual  
30 simulation program that is suitable for nursing professional training on emergency  
31 treatment of severe respiratory infectious diseases emergencies.  
32  
33  
34  
35  
36  
37  
38  
39  
40

41 This study reconstructed 3D virtual hospital real scene, incorporated COVID-19  
42 cases in to the training, and showed the real scenes of isolation ward and patient's  
43 discomfort by virtual simulation technology. The trainees can carry out the operation  
44 and practice<sup>[23]</sup> in the immersive environment, so as to quickly master the essentials,  
45 adapt to the work context, improve the emergency rescue ability and comprehensive  
46 quality, thus to provide a basis for training emergency rescue nursing for public health  
47 emergencies and establishing emergency reserve nursing rescue team in the future.  
48  
49  
50  
51  
52  
53  
54  
55  
56  
57  
58  
59  
60

## METHODS

The study was conducted at a general hospital in Hengyang, Hunan Province, China. From January to March 2020, the hospital treated 80% of the local COVID-19 confirmed patients; and by March 2, all those patients recovered and were discharged from the hospital. Since then, there has been no more newly confirmed COVID-19 case in the region. In May 2020 (two months after the stability of the local epidemic situation), 120 eligible nurses were enrolled in this study and randomly divided into control group and experimental group. All nurses are managed by the Emergency Prep Nurse Training Team of the hospital. When the nurse passed the assessment after training, he/she would be directly selected into the emergency nurse talent bank of the local public health emergency.

### *Ethics*

This study was approved by the Ethics Committee of Affiliated Nanhua Hospital of University of South China (2020-ky-49). All subjects were informed of voluntarily participating and could withdraw from the study at any time. The participant's personal information is confidential and can only be accessed by the authors.

### *Patient and Public Involvement statement*

No patients were involved in this study. This study/article focused on a novel training mode with virtual reality technology for nurses dealing with public health emergencies.

### *Training*

From May to July in 2020, the nurses in the control and experimental groups were trained according to the following program.

- (1) Control group received traditional training.

A 10-member emergency nursing instructor team was set up, including the experts in medical treatment, nursing care, nosocomial infection control, psychology, and teaching had been working in the front-line treatment of COVID-19. The task of the instructors was to teach theory, train operational skills, and organize emergency drills. The training lasted 3 months, once a week, and 4 class hours of each session,

1  
2  
3 including 2 class hours of lecture on theory and 2 class hours of demonstration and  
4 intensive training. The contents of training included the guidelines of COVID-19  
5 prevention and treatment, disinfection, quarantine, and nosocomial infection control,  
6 rescue and psychological care of patients in critical condition, experience sharing of  
7 frontline anti-epidemic medical care, as well as preparation of common epidemic  
8 prevention materials, general skills of epidemic control, and advanced life support.  
9 Especially, the training attached great importance to self-protection and anti-pressure  
10 ability in the anti-epidemic effort. The basic operation skills training included donning  
11 and doffing personal protective equipment, common disinfection and isolation  
12 technologies in the ward, CPR, sputum aspiration, oxygen inhalation, trachea cannula,  
13 arteriopuncture and venepuncture, simple respirator, defibrillator, various types of  
14 ventilators, high-frequency oxygen flow ventilation support, etc. During the rest of the  
15 training time, training in small group was organized. At the end of the training, two  
16 comprehensive simulation exercises based on emergency plan were conducted in  
17 batches.  
18  
19  
20  
21  
22  
23  
24  
25  
26  
27  
28

29 (2) The experimental group received virtual simulation training on the basis of  
30 the traditional training.  
31  
32

33 Firstly, setting up a team and preparing cases: we set up an instructor team of  
34 virtual simulation training for emergency rescue of respiratory infectious diseases (one  
35 teacher for virtual training and information technology support was enrolled on the  
36 basis of the instructor team of the control group). The instructor team was responsible  
37 for selecting three typical cases of COVID-19 (the private information of the patients  
38 in the cases, e.g., name, telephone number, address, were removed) including one  
39 severe case of an adult patient, one critical case of an elderly patient complicated with  
40 underlying diseases such as diabetes, and one critical case of an eight-year-old child  
41 patient. The whole treatment processes of those 3 cases were analyzed, from which the  
42 high-frequently used operations, key operations, difficult operations involved in first-  
43 aid nursing, key points in nursing work, possible problems, difficulties, and feasible  
44 solutions were sorted out and compiled into the cases of virtual simulation training.  
45  
46  
47  
48  
49  
50

51 Secondly, setting the scenario and building up the platform: we created four  
52 virtual scenes, i.e., pre-hospital reception, fever clinics reception and transferring,  
53 intensive care unit, and general ward, for the trainees getting familiar with different  
54 work environments. At the same time, the cases in the training system can simulate  
55 the real pathological development process, diagnosis and treatment, nursing care,  
56 disinfection and quarantine, drug reaction prevention, psychological change, etc. The  
57  
58  
59  
60

1  
2  
3 tasks include all the training items related to COVID-19, e.g., operational skills  
4 training, comprehensive clinical capability training, disinfection and quarantine  
5 standard operating procedure (SOP), standard occupational protection, and  
6 occupational exposure emergency handling, patient going out for medical  
7 examination, and specimen transportation, SOP of entry and exit of the isolation  
8 ward, and SOP for donning and doffing personal protective equipment (see Fig.1).  
9  
10  
11  
12

13 Third, implementing the training: the training lasted 3 months, once a week, 4  
14 class hours each time, among which, 2 h for the trainees to practice with the  
15 simulated cases in the virtual system, 1.5 h for the trainees to get real practice in  
16 small groups, for example, they could use multi-functional dummies or models for  
17 actual nursing operation practice, 0.5 h for summarizing and exchanges, such as  
18 asking questions on the training, discussing unexpected situations or emergencies  
19 handling, and sharing views on the nursing problems and measures in the cases. In  
20 their spare time, the trainees can make appointment on the hospital virtual training  
21 platform to repeat and review the practices.  
22  
23  
24  
25  
26  
27  
28  
29

### 30 Evaluation Criteria

31  
32 (1) Assessment of theory and skills: the nurses of the two groups were assessed on their  
33 relevant theoretical knowledge and skills before and after the intervention.  
34  
35  
36  
37

38 (2) Emergency rescue ability scoring: the instructors as the judge evaluate the  
39 emergency rescue ability of the nurses of the two groups before and after the  
40 intervention. The design of the scoring scale was based on the study of Wang.<sup>[24]</sup> It  
41 focuses five dimensions with 100 points in total, including the ability of occupational  
42 protection, disinfection, and quarantine (20), observation and judgment of disease (20),  
43 preliminary examination, classification, and treatment of the patients in severe or  
44 critical condition (20), cooperation and coordination (20), and crisis assessment and  
45 management (20). The higher score the nurse gained, the greater ability of rescuing and  
46 dealing with emergencies the nurse has. The Cronbach's  $\alpha$  coefficient was 0.79.  
47  
48  
49  
50  
51  
52  
53  
54

55 (3) The Chinese version of Nurse Disaster Preparedness Scale: the scale was prepared  
56 by LI,<sup>[25]</sup> which was translated and adjusted culturally from Tichy's scale.<sup>[26]</sup> The  
57 Cronbach's  $\alpha$  coefficient is 0.865, including 45 items of three dimensions: knowledge  
58 on disaster (13 items), technology for disaster relief (11 items) and post-disaster  
59  
60

1  
2  
3 management (21 items). The contents of the scale included risk reduction, disease  
4 prevention and health promotion, policy making and development, ethics, legal  
5 practices and liabilities, communication and information sharing, education and  
6 preparedness for disaster, community care, individual and home care, psychological  
7 care, care for vulnerable groups, long-term rehabilitation of individual, family, and  
8 community, etc.,<sup>[5]</sup> which could comprehensively reflect the situation of nurses' disaster  
9 preparedness. Items were scored 1 ~ 6 points from "strongly disagree" to "strongly  
10 agree." The higher the score gained, the better the disaster preparedness the nurse had.  
11  
12  
13  
14  
15  
16  
17

### 18 **Statistical Analysis**

19  
20 All data were input into SPSS 18.0 and were statistical analyzed. The *P value* less than  
21 0.05 was considered statistically significant.  
22  
23  
24  
25  
26  
27  
28  
29  
30  
31  
32  
33  
34  
35  
36  
37  
38  
39  
40  
41  
42  
43  
44  
45  
46  
47  
48  
49  
50  
51  
52  
53  
54  
55  
56  
57  
58  
59  
60

## RESULTS

### (1) Demographic Data

Table 1 presents the demographic data comparison between the two groups of participants. The majority of the 120 subjects in this study were women (control group: 91.67%, experimental group: 88.33%).

The differences in sex, age, education background, and work experience between the two groups were not statistically significant ( $P > 0.05$ ) and were comparable.

Table 1 Demographic Data

| basic characteristics | control group       | experimental group | t/ $\chi^2$ | P     |
|-----------------------|---------------------|--------------------|-------------|-------|
|                       | ( n=60 )            | ( n=60 )           |             |       |
| sex                   | male                | 7                  | 0.093       | 0.761 |
|                       | female              | 53                 |             |       |
| age                   | $\leq 30$ years old | 28                 | 0.255       | 0.754 |
|                       | 31-39 years old     | 24                 |             |       |
|                       | $\geq 40$ years old | 7                  |             |       |
| years of service      | $\leq 5$ years      | 23                 | 0.111       | 0.912 |
|                       | 6-14 years          | 21                 |             |       |
|                       | $\geq 15$ years     | 13                 |             |       |
| education background  | diploma             | 10                 | 0.06        | 0.97  |
|                       | /associate degree   |                    |             |       |
|                       | Bachelor's degree   | 41                 |             |       |
|                       | Master's degree     | 9                  |             |       |
| professional title    | primary             | 29                 | 0.165       | 0.921 |
|                       | intermediate        | 21                 |             |       |

|                                     |                |    |    |       |       |
|-------------------------------------|----------------|----|----|-------|-------|
|                                     | senior         | 10 | 10 |       |       |
| emergency/critical care specialist  | No             | 38 | 37 | 0.036 | 0.850 |
| nurse                               | Yes            | 22 | 23 |       |       |
| nursing experience of fighting      | No             | 45 | 43 | 0.17  | 0.68  |
| agaist SARS/COVID-9                 | Yes            | 15 | 17 |       |       |
| infectious diseases care experience | No             | 39 | 37 | 0.144 | 0.705 |
|                                     | Yes            | 21 | 23 |       |       |
|                                     | medical ward   | 19 | 19 |       |       |
|                                     | surgical ward  | 14 | 15 |       |       |
|                                     | emergency      | 8  | 7  |       |       |
| department                          | department     |    |    | 0.27  | 0.998 |
|                                     | ICU            | 8  | 9  |       |       |
|                                     | pediatric ward | 5  | 5  |       |       |
|                                     | others         | 6  | 5  |       |       |

## (2) Comparison of the scores of disaster preparedness before and after intervention

Before intervention, there was no significant difference in the score of disaster preparedness between the two groups ( $P > 0.05$ , [Table 2](#)). After intervention, the total disaster preparedness score of the experimental group was significantly higher than that of the control group ( $P = 0.000$ , [Table 2](#)). The scores of disaster preparedness and response of the experimental group were significantly higher than those of the control group ( $P < 0.001$ , [Table 2](#)), while the scores of post-disaster recovery between the groups were not statistically significant ( $P > 0.05$ , [Table 2](#)).



**Table 2 Comparison of the scores of disaster preparedness before and after intervention**

|                             | disaster preparedness |                       | disaster response    |                       | Post-disaster recovery |                       | total score          |                       |
|-----------------------------|-----------------------|-----------------------|----------------------|-----------------------|------------------------|-----------------------|----------------------|-----------------------|
|                             | (mean ± SD)           |                       | (mean ± SD)          |                       | (mean ± SD)            |                       | (mean ± SD)          |                       |
|                             | pre-<br>intervention  | post-<br>intervention | pre-<br>intervention | post-<br>intervention | pre-<br>intervention   | post-<br>intervention | pre-<br>intervention | post-<br>intervention |
| control<br>group(n=60)      | 101.73±17.94          | 122±12.79             | 52.2±10.52           | 69.42±7.89            | 24.08±5.68             | 27.47±4.77            | 178.02±30.60         | 218.88±21.34          |
| experimental<br>group(n=60) | 104.38±14.47          | 131.22±6.99           | 51.55±8.72           | 75.95±4.52            | 23.82±4.68             | 28.05±3.26            | 179.75±20.23         | 235.22±10.75          |
| t                           | 0.891                 | 4.9                   | 0.369                | 5.566                 | 0.281                  | 0.782                 | 0.366                | 5.295                 |
| P                           | 0.375                 | <0.001                | 0.713                | <0.001                | 0.779                  | 0.436                 | 0.715                | <0.001                |

SD: standard deviation, using t (t test).

### (3) Comparison of the scores of theoretical and skill assessments and emergency rescue ability before and after intervention

There was no significant difference in the scores of theoretical and skill assessments and emergency rescue ability between the two groups before intervention ( $P > 0.05$ , [Table 3](#)). After intervention, the theoretical assessment score and the score of emergency rescue ability of the two groups were improved. The theoretical assessment and emergency rescue capability scores of the experimental group were significantly higher than those of the control group ( $P < 0.001$ , [Table 3](#)), while the practical skill score of the control group was significantly higher than that of the experimental group ( $P < 0.01$ , [Table 3](#)).

**Table 3 Comparison of the scores of theoretical and skill assessments and emergency rescue ability before and after intervention**

|                          | Theoretical assessment score |                   | Practical skills score |                   | emergency rescue ability score |                   |
|--------------------------|------------------------------|-------------------|------------------------|-------------------|--------------------------------|-------------------|
|                          | (mean ± SD)                  |                   | (mean ± SD)            |                   | (mean ± SD)                    |                   |
|                          | pre-intervention             | post-intervention | pre-intervention       | post-intervention | pre-intervention               | post-intervention |
| control group(n=60)      | 65.12±7.04                   | 82.92±4.55        | 71.13±4.57             | 90.35±3.38        | 63.1±7.23                      | 81.97±4.45        |
| experimental group(n=60) | 65.62±7.16                   | 86.62±3.91        | 71.77±5.66             | 88.47±4.19        | 63.93±6.65                     | 85.35±3.93        |
| t                        | 0.386                        | 4.783             | 0.035                  | 2.708             | 0.657                          | 4.416             |
| P                        | 0.7                          | < 0.001 **        | 0.972                  | 0.008 **          | 0.516                          | < 0.001**         |

\*\* :  $p < 0.01$

#### (4) Analysis of influence factors on disaster preparedness of nurses in experimental group

In order to find out the factors influencing the disaster preparedness of the experimental group, we conducted a related factor analysis among sex, age, length of service, education background, first-aid/intensive care work experience, and nursing experience of fighting against SARS/COVID-9. The results showed that age, length of service, working experience of emergency department or intensive care unit, and nursing experience of fighting against SARS/COVID-9 had statistically significant impacts on disaster preparedness of the reserve nurses ( $P < 0.05$ , Table 4), while education background, sex, and professional title had no statistically significant impact ( $P > 0.05$ , Table 4).

1  
2  
3  
4  
5  
6  
7  
8  
9  
10  
11  
12  
13  
14  
15  
16  
17  
18  
19  
20  
21  
22  
23  
24  
25  
26  
27  
28  
29  
30  
31  
32  
33  
34  
35  
36  
37  
38  
39  
40  
41  
42  
43  
44  
45  
46  
47  
48  
49  
50  
51  
52  
53  
54  
55  
56  
57  
58  
59  
60

For peer review only

**Table 4 Analysis of influence factors on disaster preparedness of nurses in experimental group (Mean  $\pm$  SD)**

| category         | case                | Disaster preparedness |                                 | Disaster response  |                               | Post-disaster recovery |                   | Total score      |                                 | P                              |       |
|------------------|---------------------|-----------------------|---------------------------------|--------------------|-------------------------------|------------------------|-------------------|------------------|---------------------------------|--------------------------------|-------|
|                  |                     | pre-intervention      | post-intervention               | pre-intervention   | post-intervention             | pre-intervention       | post-intervention | pre-intervention | post-intervention               |                                |       |
| sex              | male                | 7                     | 103 $\pm$ 15.41                 | 133.57 $\pm$ 8.34  | 51.57 $\pm$ 5.13              | 75.57 $\pm$ 3.5        | 25.86 $\pm$ 2.97  | 29.29 $\pm$ 2.06 | 180.4 $\pm$ 18.43               | 238.43 $\pm$ 10.61             | >0.05 |
|                  | female              | 53                    | 104.57 $\pm$ 14.49              | 130.91 $\pm$ 6.82  | 51.55 $\pm$ 9.12              | 76 $\pm$ 4.66          | 23.55 $\pm$ 4.82  | 27.89 $\pm$ 3.37 | 179.7 $\pm$ 20.62               | 234.79 $\pm$ 10.8              |       |
| age              | $\leq$ 30 years old | 28                    | 100.1 $\pm$ 16.95               | 129.71 $\pm$ 6.81  | 48.79 $\pm$ 9.62              | 75.07 $\pm$ 4.69       | 22.86 $\pm$ 4.95  | 27.61 $\pm$ 3.29 | 170.9 $\pm$ 21.8 <sup>a</sup>   | 232.4 $\pm$ 10.65 <sup>b</sup> | <0.05 |
|                  | 31-39 years old     | 24                    | 110.25 $\pm$ 10.04              | 133.21 $\pm$ 7     | 55.46 $\pm$ 6.15              | 77.54 $\pm$ 3.2        | 25 $\pm$ 4.33     | 28.83 $\pm$ 3.21 | 190.7 $\pm$ 14.99 <sup>a</sup>  | 239.58 $\pm$ 10.1 <sup>b</sup> |       |
|                  | $\geq$ 40 years old | 8                     | 101.75 $\pm$ 11.18              | 130.5 $\pm$ 6.93   | 52.63 $\pm$ 6.3               | 74.25 $\pm$ 6.2        | 23.63 $\pm$ 4.47  | 27.25 $\pm$ 3.2  | 178 $\pm$ 20.23 <sup>a</sup>    | 232 $\pm$ 9.62 <sup>b</sup>    |       |
| years of service | $\leq$ 5 years      | 23                    | 99.52 $\pm$ 16.48 <sup>c</sup>  | 129.71 $\pm$ 1.62  | 48.26 $\pm$ 8.66 <sup>d</sup> | 76.05 $\pm$ 3.87       | 22.91 $\pm$ 5.11  | 27.76 $\pm$ 3.14 | 170.7 $\pm$ 23.72 <sup>e</sup>  | 233.5 $\pm$ 10.27              | >0.05 |
|                  | 6-14years           | 25                    | 110.8 $\pm$ 10.36 <sup>c</sup>  | 132.44 $\pm$ 76.42 | 52.68 $\pm$ 8.50 <sup>d</sup> | 76.2 $\pm$ 4.92        | 24.48 $\pm$ 4.37  | 28.64 $\pm$ 3.67 | 187.24 $\pm$ 15.99 <sup>e</sup> | 237.28 $\pm$ 11.97             |       |
|                  | $\geq$ 15years      | 12                    | 101.83 $\pm$ 14.01 <sup>c</sup> | 131.29 $\pm$ 7.32  | 55.5 $\pm$ 7.55 <sup>d</sup>  | 75.35 $\pm$ 4.96       | 24.17 $\pm$ 4.55  | 27.43 $\pm$ 3.3  | 181.5 $\pm$ 14.5 <sup>e</sup>   | 234.07 $\pm$ 9.14              |       |
| education        | diploma             | 10                    | 104.5 $\pm$ 16.41               | 132.2 $\pm$ 7.11   | 53.4 $\pm$ 3.74               | 76.8 $\pm$ 3.65        | 22.5 $\pm$ 3.41   | 26.7 $\pm$ 2.5   | 180.4 $\pm$ 17.85               | 235.7 $\pm$ 7.83               | >0.05 |
|                  | /associate          |                       |                                 |                    |                               |                        |                   |                  |                                 |                                |       |

|                                                     |                   |    |                           |             |             |                         |            |            |                           |              |       |
|-----------------------------------------------------|-------------------|----|---------------------------|-------------|-------------|-------------------------|------------|------------|---------------------------|--------------|-------|
| background                                          | degree            |    |                           |             |             |                         |            |            |                           |              |       |
|                                                     | Bachelor's degree | 41 | 105.02±15.05              | 130.56±7.15 | 51.46±9.21  | 75.9±4.58               | 23.46±4.81 | 28.02±3.34 | 179.95±22.64              | 234.49±11.86 |       |
|                                                     | Master's degree   | 9  | 101.33±9.72               | 133.11±6.33 | 49.89±10.62 | 75.22±5.43              | 26.89±4.4  | 29.67±3.24 | 178.11±9.63               | 238±8.31     |       |
|                                                     | primary           | 29 | 101.97±15.63              | 130.14±7.18 | 49.69±9.34  | 75.69±4.45              | 23.1±5.07  | 27.76±3.43 | 174.76±23.11              | 233.59±10.06 |       |
| professional title                                  | Intermediate      | 21 | 110.29±14.16              | 132.86±6.66 | 51.67±8.24  | 76.05±5.03              | 24.57±4.34 | 28.48±3.3  | 186.53±17.47              | 237.38±12.15 | >0.05 |
|                                                     | senior            | 10 | 99±5.79                   | 130.9±7.14  | 56.7±5.93   | 76.5±3.92               | 24.3±4.3   | 28±2.87    | 180±12.45                 | 235.4±9.79   |       |
| emergency/ICU specialist nurse                      | No                | 37 | 100.78±13.98 <sup>f</sup> | 130.51±6.86 | 50.86±9.07  | 76.14±4.18              | 23.7±4.89  | 28.22±3.43 | 175.35±20.68 <sup>g</sup> | 234.87±10.27 | >0.05 |
|                                                     | Yes               | 23 | 110.17±13.98 <sup>f</sup> | 132.35±7.2  | 52.65±8.19  | 75.65±5.1               | 24±4.43    | 27.78±3.01 | 186.83±17.69 <sup>g</sup> | 235.78±11.7  |       |
| nursing experience of fighting against SARS/COVID-9 | No                | 43 | 101.62±14.73              | 130.4±6.81  | 49.36±7.75  | 75.27±4.56              | 23.67±4.49 | 27.73±3.20 | 174.64±19.4               | 233.4±9.99   | <0.05 |
|                                                     | Yes               | 17 | 112.67±10.08              | 133.67±7.16 | 58.13±8.34  | 78±3.84                 | 24.27±5.36 | 29±3.36    | 195.07±14.4               | 240.67±11.44 |       |
| infectious diseases care work                       | No                | 37 | 99.49±13.07 <sup>h</sup>  | 130.56±7.14 | 50.44±8.81  | 74.85±4.93 <sup>i</sup> | 24.46±4.05 | 28.51±2.94 | 174.39±18.81              | 233.92±11.33 |       |
| experience in infectious diseases dept.             | Yes               | 23 | 108.19±15.36 <sup>h</sup> | 132.43±6.68 | 54.05±7.52  | 78±2.7 <sup>i</sup>     | 22.62±5.58 | 27.19±3.71 | 184.86±23.57              | 237.62±9.38  | >0.05 |

|            |                      |    |             |             |             |            |            |            |              |              |       |
|------------|----------------------|----|-------------|-------------|-------------|------------|------------|------------|--------------|--------------|-------|
|            | medical ward         | 19 | 105.1±12.12 | 129.68±6.75 | 54.1±8.56   | 78.05±3.27 | 22.9±5.56  | 27.26±3.41 | 182.1±19.62  | 235±9.96     |       |
|            | surgical ward        | 15 | 99.27±16.93 | 131.8±7.39  | 47.87±10.17 | 75.4±5.19  | 24.2±4.66  | 28.67±3.5  | 171.33±25.3  | 235.87±11.92 |       |
|            | emergency department | 5  | 97.29±15.85 | 133.29±8.38 | 52.29±2.14  | 74.57±5.03 | 23±4.65    | 26.71±3.14 | 172.57±17.79 | 234.57±12.69 |       |
| Department | ICU                  | 9  | 116.11±8.64 | 130.78±6.63 | 48.89±11.59 | 73.33±5.17 | 24.11±4.31 | 27.67±3    | 189.11±13.63 | 231.78±11.43 | >0.05 |
|            | pediatric ward       | 7  | 107.6±12.86 | 136.6±5.5   | 53.6±5.37   | 76.8±2.39  | 25.2±3.56  | 29.4±2.07  | 186.4±17.05  | 242.8±7.05   |       |
|            | others               | 5  | 102.6±14.69 | 127.8±5.4   | 54.6±2.88   | 75.4±4.39  | 25.4±3.78  | 30.4±2.7   | 182.6±16.8   | 233.6±10.24  |       |

SD: standard deviation, using t/F (t test or ANOVA).

Age: P<sup>a</sup>=0.01, T=7.671; P<sup>b</sup>=0.034, T=3.592

Years of service: P<sup>c</sup>=0.03, T=3.743; P<sup>d</sup>=0.043, T=3.324; T=4.551, P<sup>e</sup>=0.015

Emergency/critical care specialist nurse: P<sup>f</sup>=0.013, F=2.557; P<sup>g</sup>=0.026, F=2.288

Infectious diseases care experience: P<sup>h</sup>=0.034, F=2.202; P<sup>i</sup>=0.002, F=3.201.

## DISCUSSION

The results of this study showed that after three months of training, compared with the control group, the virtual simulation training combined with off-line operation training improved the disaster preparedness of reserve nurses and achieved a better outcome ( $P < 0.05$ , Table 2). We, therefore, think that the virtual simulation training combined with off-line operation training mode is more beneficial to improving the disaster preparedness of reserve nurses than the traditional training mode, it is a kind of emergency response to intensive respiratory infectious diseases emergency, and it is suitable for nursing professional training, thus it is worthy of further exploration and promotion.

The interviews after the training showed that more than 95% of the nurses in the experimental group were satisfied with the virtual simulation training mode. They considered this training method was novel. During the training, when facing lifelike scenes and COVID-19 cases, they could not only be quickly familiar with the special layout of zone and work environment for infectious diseases and master the SOP of emergency response, but also had a better understanding of the dynamic changes of the patient's condition and the whole process of treatment. It is convenient for trainees to be familiar with their professional roles, learn actively, dare to operate, so as to deepen and consolidate the theories and skills of emergency rescue. In the cases, various unexpected conditions in the nursing work, such as the changes of patient's condition, the psychological change of patients, and some settings of the difficulties, can improve nurses' psychological resilience and the ability of responding to the changes.<sup>[17]</sup> The simulation training program also has the mode of team/group training, which can quickly mobilize the initiative of the trainees and let them cooperate with the team members while completing their own tasks. This role training enables the trainees to have a global view and helps them to find their own positions in team, so as to improve the cooperation and coordination within a team. In the event of a disaster, the trainees can quickly mobilize their reserve capacity to participate in a highly cooperative rescue operation. In addition, as this training program has been incorporated into the virtual teaching platform of the hospital, the trainees can make appointment for repeating and reviewing what they have learnt at their spare time, which can make up the limitations of place, time, and learning time of the traditional centralized face-to-face training.

However, most of the trainees considered the virtual simulation was not so helpful in real operations, and they need more time for off-line training. In this study, the scores

1  
2  
3  
4 of practical operation skills in the control group were significantly higher than those in  
5 the experimental group ( $P < 0.01$ , [Table 3](#)), which indicated that the traditional mode  
6 was better than the virtual simulation training mode in respect of skill training.  
7  
8 Therefore, virtual simulation training in the future should pay more attention to the  
9 balance of virtual and real training and increase the training time of the real practice.<sup>[27-  
10 28]</sup> Some researchers<sup>[29]</sup> have mixed standardized patient simulation teaching, 3D virtual  
11 environment team learning of Second life software, and the interdisciplinary  
12 cooperative learning of Neighborhood software, and picked up the advantages of each  
13 approach to cultivate trainees' comprehensive clinical ability, which is worthy of  
14 reference.  
15  
16  
17  
18  
19  
20  
21

22 This study found that the post-disaster recovery scores of the nurses of the two  
23 groups before intervention were low. After intervention, the scores of both two groups  
24 were only slightly improved, and there was no statistical difference between the scores  
25 of the two groups ( $P > 0.05$ , [Table 2](#)).  
26  
27  
28  
29  
30

31 The possible reason was that the training of the two groups paid attention to the  
32 psychological nursing support to the patients in hospital, but neglected the  
33 psychological nursing support to the patients after being discharged from hospital and  
34 lacked the related knowledge of post-traumatic stress disorder (PTSD). The result also  
35 reflected the emergency reserve nurses in the region currently lacked knowledge of  
36 post-traumatic stress, suggesting that our training program should pay enough attention  
37 to post-traumatic recovery of our nurses in the future.  
38  
39  
40  
41  
42  
43  
44

45 Analysis of influencing factors of disaster nursing ability: (1) The nurses with  
46 work experience in SARS/COVID-19 ward and infectious diseases ward had higher  
47 disaster preparedness, indicating that the nurses with disaster relief experience had  
48 higher disaster preparedness than those lacked disaster relief experience. (2) Scores of  
49 disaster preparedness of nurses with different years of service: the nurses with 6~14  
50 years of service  $>$  15 years of service  $>$  1~5 years of service. The possible reasons  
51 were as follows: the nurses with 6~14 years of service were the backbone of the  
52 hospital and the focuses of training and assessment, as they had strong learning and  
53 practicing ability. Those with more than 15 years of service generally engaged in  
54 management or non-clinical work. Although they have rich work experience, they  
55  
56  
57  
58  
59  
60



1  
2  
3 received less assessment or lacked learning motivation, thus their emergency  
4 preparedness and ability of response had declined. The nurses with 1~5 years of  
5 service had high learning enthusiasm and could acquire new knowledge quickly, but  
6 they lacked work experience and professional ability, so their emergency response  
7 capacity also needed to be improved. This result was generally consistent with the  
8 investigations during COVID-19 epidemic period<sup>[4-6]</sup>.  
9  
10  
11  
12  
13  
14  
15  
16  
17  
18  
19  
20  
21  
22  
23  
24  
25  
26  
27  
28  
29  
30  
31  
32  
33  
34  
35  
36  
37  
38  
39  
40  
41  
42  
43  
44  
45  
46  
47  
48  
49  
50  
51  
52  
53  
54  
55  
56  
57  
58  
59  
60

For peer review only

## Limitations

There are some limitations in our study: (1) The sample size of the study is small, and the subjects all come from only one hospital, so the reference significance of the analysis results on factors affecting disaster preparedness is limited. (2) Due to the limitation of resources, the virtual scene of make shift hospital is not constructed in the virtual training program, which will be added in the future study. (3) The training related to post-disaster care and PTSD was not paid enough attention, which will be improved in the future.

For peer review only

## CONCLUSION

On training the disaster preparedness of reserve nurses, the virtual simulation training combined with off-line training can achieve better outcomes than the conventional training. This novel training mode has more advantages in improving the theoretical knowledge, emergency rescue ability, disaster preparedness, and disaster response ability, which can be adopted as a new approach to the emergency training in medical institutions in response to public security emergencies.

For peer review only

## Acknowledgements

We would like to thank Department of Nursing of Health Science Center of Xi'an Jiaotong University, School of Nursing and Affiliated Nanhua Hospital of University of South China for their great support to this study.

## Funding Sources

This study was supported by the grants from Shaanxi Province (SGH140537), the Xi'an Social Science Fund [19S75] and Xi'an Jiaotong University Fund, the Fund of Hunan social science achievement appraisal committee (XSP21YBC228), Special fund for Anti-COVID-19 of Special project in the year of 2020 for the construction of innovative province of Hunan Provincial Science and Technology Department (2020SK3040), and Special fund for basic research project of COVID-19 prevention and treatment of the technology innovation guidance program of Hengyang Science and Technology Bureau (202010031581).

## Conflict of Interest

The authors declare that there are no conflicts of interest.

## REFERENCES

- 1 Johns Hopkins .Coronavirus Resource Center.Accessed August 10, 2020.  
<https://coronavirus.jhu.edu/map.html>.
- 2 Guha-Sapir D, Hoyois P & Below R. (2015) Annual Disaster Statistical Review 2014: The numbers and trends. Available at: <http://hdl.handle.net/2078.1/171092> (accessed 23 October 2016).
- 3 Turale, Sue. Disaster training for nurses: a moral and humanitarian imperative. *International Nursing Review* 2014; 61:3.
- 4 Jinlei BAO, Bolun SUN, Hui ZHANG, et al. Investigation on disaster preparedness of clinical nurses going to Wuhan to fight against epidemic diseases in Jilin province. *Chinese Nursing Research* 2020;34:938-940.
- 5 Huiping WANG, Fei ZHOU, Weihong LIU, et al. A survey on the disaster preparedness of clinical nurses in epidemic period of novel coronavirus pneumonia. *Journal of Nursing Administration* 2020;20:229-233.
- 6 LIU Chunzi, YU Yanbo, LIU Huijuan, et al. Disaster preparedness of nurses in three COVID-19 designated hospitals in Beijing and its influencing factors: A cross-sectional study. *Academic Journal of Chinese PLA Medical School* 2020;41:237-241.
- 7 L J Labrague, K Hammad, D S Gloe, et al. Disaster Preparedness Among Nurses: A Systematic Review of Literature. *Int Nurs Rev* 2018;65:41-53.
- 8 O'Sullivan TL, Dow D, Turner MC, et al. Disaster and emergency management: Canadian nurses' perceptions of preparedness on hospital front lines. *Prehosp Disaster Med* 2008;23:s11-s18.
- 9 Usher K, Mills J, West C, et al. Cross-sectional survey of the disaster preparedness of nurses across the Asia-Pacific region. *Nurs & Health Sci* 2015;17:434-443.

- 1  
2  
3  
4 10 Hodge AJ, Miller EL, Dilts Skaggs MK. Nursing self-perceptions of emergency  
5 preparedness at a rural hospital. *J Emerg Nurs* 2017;43:10-14.  
6  
7  
8  
9 11 Seher Deniz ÖZTEKI N, Eric E. LARSON, Makoto AKAHOSHI, et al. Japanese  
10 nurses' perception of their preparedness for disasters: Quantitative survey research  
11 on one prefecture in Japan. *Japan Journal of Nursing Science* 2016;13:391-401.  
12  
13  
14  
15 12 G Taskiran, U Baykal. Nurses' Disaster Preparedness and Core Competencies in  
16 Turkey: A Descriptive Correlational Design. *Int Nurs Rev*, 2019, 66:165-175.  
17  
18  
19  
20 13 Xiaohua XU, Yu SHENG, Zhen LI, et al. A cross-sectional survey of the disaster  
21 preparedness of nurses in China. *Chinese Journal of Nursing* 2016;5: 903-908.  
22  
23  
24  
25 DOI:10.3761/j.issn.0254-1769.2016.08.002.  
26  
27  
28 14 Nilsson J, Johansson E, Carlsson M, et al. Disaster nursing: self-reported competence  
29 of nursing students and registered nurses, with focus on their readiness to manage  
30 violence, serious events and disasters. *Nurse Educ Pract* 2016;17:102-108.  
31  
32  
33  
34 15 Yang WANG, Tao ZHANG, Jin LI. Switzerland launches "INSARAG Countdown  
35 to 2018" earthquake rescue simulation exercise. *China Emergency Rescue*  
36  
37  
38  
39 2018:59-63.  
40  
41  
42 16 Rui Xia, Sijian Li, Bingbing Chen. Evaluating the effectiveness of a disaster  
43 preparedness nursing education program in Chengdu, China. *Public Health*  
44  
45  
46  
47 *Nursing* 2020:1-8. DOI: 10.1111/phn.12685.  
48  
49  
50 17 Xiaoyu WANG, Qiupin ZHU. Training model and practice of reserve nurses oriented  
51 by disaster preparedness. *Chinese General Practice Nursing* 2019;26:3315-3317.  
52  
53  
54 18 Ghezeljeh T N, Aliha J M, Haghani H, et al. Effect of education using the virtual  
55 social network on the knowledge and attitude of emergency nurses of disaster  
56 preparedness: A quasi-experiment study. *Nurse Education Today*, 2019:88-93.  
57  
58  
59 19 Achora, S. & Kamanyire, J.K. Disaster Preparedness: Need for inclusion in  
60

- 1  
2  
3 undergraduate nursing education. *Sultan Qaboos University Medical Journal*  
4 2016;16 (1), e15.  
5  
6  
7 20 Rutherford-Hemming T, Alfes CM. The use of hospital-based simulation in nursing  
8 education: a systematic review. *Clin Simul Nurs* 2017;13:78-89.  
9  
10  
11  
12 21 Second life: education in the virtual world [EB/OL]. [2017-09-11].  
13  
14 <http://go.secondlife.com/landing/education/>.  
15  
16  
17  
18 22 National virtual simulation experiment teaching sharing platform experiment  
19 space [in Chinese] [2017-09-11]. [EB/OL]. <http://www.ilab-x.com/>.  
20  
21  
22  
23 23 Derya Uzelli Yilmaz, Sevil Hamarat Tuncalı and Yusuf Yilmaz. Nursing  
24 Education in the Era of Virtual Reality 2020:47-69.  
25  
26  
27  
28 24 WANG Yuling, LIU Yu, LI Tanshi. The survey about the knowledge level of  
29 emergency treatment during the disasters among the emergency nurses and the  
30 countermeasures [in Chinese]. *Chinese Journal of Nursing* 2006;22:67-68.  
31  
32  
33  
34 25 LI Zhen, SHENG Yu. An investigation of emergency nurses' preparedness for  
35 disasters in China [in Chinese]. *Chinese Journal of Nursing* 2014;49:699-703.  
36  
37  
38  
39 26 M. Tichy, A.E. Bond, R.L. Beckstrand, et al. Nurse practitioners' perception of  
40 disaster preparedness education 2009;13:10-22.  
41  
42  
43  
44 27 Jung EY, Park DK, Lee YH, et al. Evaluation of practical exercises using an  
45 intravenous simulator incorporating virtual reality and haptics device technologies.  
46 *Nurse Educ Today* 2012;32:458-463.  
47  
48  
49  
50  
51 28 McWilliams LA, Malecha A. Comparing intravenous insertion instructional  
52 methods with haptic simulators. *Nurs Res Pract* 2017:1-11.  
53  
54  
55  
56 29 Holland B, Landry K, Mountain A, et al. Weaving the tapestry of  
57 learning: simulation, standardized patients, and virtual communities. *Nurse Educ*  
58 2013;38:269-272.  
59  
60

1  
2  
3  
4  
5  
6  
7  
8  
9  
10  
11  
12  
13  
14  
15  
16  
17  
18  
19  
20  
21  
22  
23  
24  
25  
26  
27  
28  
29  
30  
31  
32  
33  
34  
35  
36  
37  
38  
39  
40  
41  
42  
43  
44  
45  
46  
47  
48  
49  
50  
51  
52  
53  
54  
55  
56  
57  
58  
59  
60

For peer review only



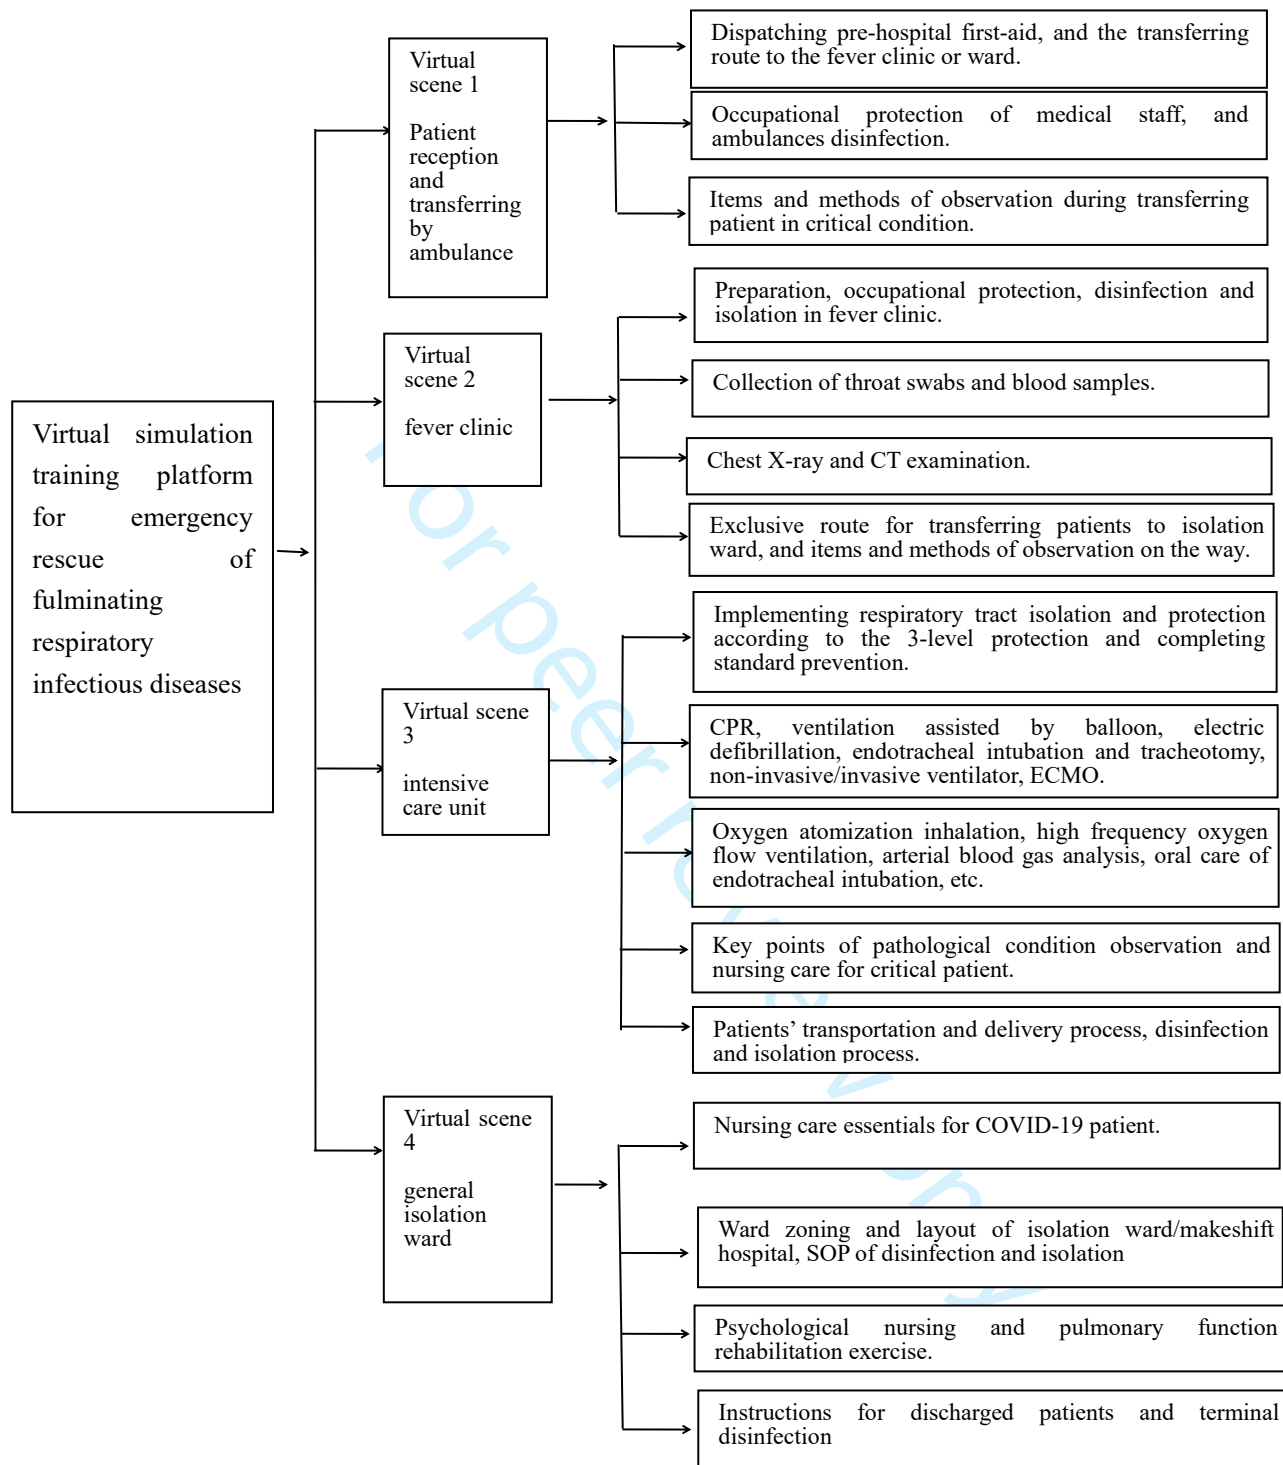

Fig.1 Design of virtual simulation training platform for emergency rescue of fulminating respiratory infectious diseases

# BMJ Open

## Effect of virtual reality simulation training on the response capability of public health emergency reserve nurses in China: a quasi-experimental study

|                                 |                                                                                                                                                                                                                                                                                                                                                                                                                                                                                                                                                                                                                                                                                            |
|---------------------------------|--------------------------------------------------------------------------------------------------------------------------------------------------------------------------------------------------------------------------------------------------------------------------------------------------------------------------------------------------------------------------------------------------------------------------------------------------------------------------------------------------------------------------------------------------------------------------------------------------------------------------------------------------------------------------------------------|
| Journal:                        | <i>BMJ Open</i>                                                                                                                                                                                                                                                                                                                                                                                                                                                                                                                                                                                                                                                                            |
| Manuscript ID                   | bmjopen-2021-048611.R1                                                                                                                                                                                                                                                                                                                                                                                                                                                                                                                                                                                                                                                                     |
| Article Type:                   | Original research                                                                                                                                                                                                                                                                                                                                                                                                                                                                                                                                                                                                                                                                          |
| Date Submitted by the Author:   | 26-Jun-2021                                                                                                                                                                                                                                                                                                                                                                                                                                                                                                                                                                                                                                                                                |
| Complete List of Authors:       | ZHANG, Dandan; Xi'an Jiaotong University, Health science center, School of Nursing<br>LIAO, Hongwu; University of South China Affiliated Nanhua Hospital<br>JIA, Yitong; Xi'an Jiaotong University, Health science center, School of Nursing<br>YANG, Wenren; University of South China Affiliated Nanhua Hospital<br>HE, Pingping; University of South China, School of Nursing<br>WANG, Dongmei; University of South China Affiliated Nanhua Hospital<br>CHEN, Yongjun; University of South China Affiliated Nanhua Hospital<br>YANG, Wei; University of South China Affiliated Nanhua Hospital<br>ZHANG, Yin-Ping ; Xi'an Jiaotong University, Health Science Center, School of Nursing |
| <b>Primary Subject Heading</b>: | Nursing                                                                                                                                                                                                                                                                                                                                                                                                                                                                                                                                                                                                                                                                                    |
| Secondary Subject Heading:      | Infectious diseases, Nursing, Public health, Medical education and training                                                                                                                                                                                                                                                                                                                                                                                                                                                                                                                                                                                                                |
| Keywords:                       | Public health < INFECTIOUS DISEASES, INFECTIOUS DISEASES, Health & safety < HEALTH SERVICES ADMINISTRATION & MANAGEMENT, EDUCATION & TRAINING (see Medical Education & Training), COVID-19                                                                                                                                                                                                                                                                                                                                                                                                                                                                                                 |
|                                 |                                                                                                                                                                                                                                                                                                                                                                                                                                                                                                                                                                                                                                                                                            |

SCHOLARONE™  
Manuscripts



I, the Submitting Author has the right to grant and does grant on behalf of all authors of the Work (as defined in the below author licence), an exclusive licence and/or a non-exclusive licence for contributions from authors who are: i) UK Crown employees; ii) where BMJ has agreed a CC-BY licence shall apply, and/or iii) in accordance with the terms applicable for US Federal Government officers or employees acting as part of their official duties; on a worldwide, perpetual, irrevocable, royalty-free basis to BMJ Publishing Group Ltd ("BMJ") its licensees and where the relevant Journal is co-owned by BMJ to the co-owners of the Journal, to publish the Work in this journal and any other BMJ products and to exploit all rights, as set out in our [licence](#).

The Submitting Author accepts and understands that any supply made under these terms is made by BMJ to the Submitting Author unless you are acting as an employee on behalf of your employer or a postgraduate student of an affiliated institution which is paying any applicable article publishing charge ("APC") for Open Access articles. Where the Submitting Author wishes to make the Work available on an Open Access basis (and intends to pay the relevant APC), the terms of reuse of such Open Access shall be governed by a Creative Commons licence – details of these licences and which [Creative Commons](#) licence will apply to this Work are set out in our licence referred to above.

Other than as permitted in any relevant BMJ Author's Self Archiving Policies, I confirm this Work has not been accepted for publication elsewhere, is not being considered for publication elsewhere and does not duplicate material already published. I confirm all authors consent to publication of this Work and authorise the granting of this licence.

1  
2  
3  
4 Title:

5  
6  
7 Effect of virtual reality simulation training on the response capability of  
8 public health emergency reserve nurses in China: a quasi-experimental  
9  
10  
11  
12 study  
13  
14  
15  
16  
17  
18

19 Dandan Zhang<sup>1</sup>, Hongwu Liao<sup>2</sup>, Yitong Jia<sup>1</sup>, Wenren Yang<sup>2</sup>, Pingping He<sup>3</sup>, Dongmei Wang<sup>2</sup>,  
20 Yongjun Chen<sup>2</sup>, Wei Yang<sup>2</sup>, Yin-Ping Zhang<sup>1\*</sup>  
21  
22

23  
24 1. *School of Nursing, Xi'an Jiaotong University Health science center, Xi'an, China*  
25

26  
27 2. *Institute of Clinical Research, Affiliated Nanhua Hospital, University of South China,*  
28  
29 *Hengyang, China*  
30

31  
32 3. *School of Nursing, University of South China, Hengyang, China*  
33  
34  
35  
36  
37

38 *§Address correspondence to:*  
39

40 Yin-Ping Zhang, PhD  
41

42  
43 School of Nursing, Xi'an Jiaotong University Health Science Center  
44

45  
46 No.76, Yanta West Road, Xi'an, Shaanxi, 710061, China  
47

48  
49 Email: cathyzh@mail.xjtu.edu.cn  
50

51  
52 Tel: +86(29) 8265 7015

53 Fax: +86(29) 8265 7015  
54  
55  
56  
57

58  
59 Conflict of Interest  
60

1  
2  
3  
4  
5  
6  
7  
8  
9  
10  
11  
12  
13  
14  
15  
16  
17  
18  
19  
20  
21  
22  
23  
24  
25  
26  
27  
28  
29  
30  
31  
32  
33  
34  
35  
36  
37  
38  
39  
40  
41  
42  
43  
44  
45  
46  
47  
48  
49  
50  
51  
52  
53  
54  
55  
56  
57  
58  
59  
60

The authors declare that there are no conflicts of interest.

The total number of words: 3719

For peer review only

## ABSTRACT

**Objective:** To develop a virtual reality simulation training program, and further verify the effect of the program on improving the response capacity of emergency reserve nurses confronting public health emergencies.

**Design:** A pre-test and post-test quasi-experimental study was conducted with a control group.

**Methods:** Overall, 120 nurses were recruited and randomly fell to the control group and the intervention group with the number table method. Participants underwent a 3-month training. To be specific, the control group received the conventional training of emergency response (e.g., theoretical lectures, technical skills and psychological training), while the intervention group underwent the virtual reality simulation training in combination with skill training. The training model incorporated COVID-19 cases into the virtual reality simulation training and then conducted the skills training. The psychological training was identical to that of the control group. At the end of the training, both groups conducted emergency drills twice. Before and after the intervention, the two groups were assessed for the knowledge and technical skills regarding responses to fulminating respiratory infectious diseases, as well as the capacity of emergency care. Furthermore, their pandemic preparedness was assessed with a disaster preparedness questionnaire.

**Results:** After the intervention, the scores of the relevant knowledge, the capacity of emergency care, and disaster preparedness in the intervention group significantly increased ( $p<0.01$ ). The score of technical skills in the control increased more significantly than the intervention group's ( $p<0.01$ ). No significant difference was identified in the score of post disaster management in two groups ( $p>0.05$ ).

**Conclusion:** Overall, the results suggest that the use of the virtual reality simulation training in combination with technical skills training is an effective way for reserve

1  
2  
3  
4 nurses to improve the response capacity of emergency. Such a novel training mode on  
5 public health emergencies for nurses requires to be explored and popularized in depth.  
6  
7  
8  
9

10  
11 **Keywords:** virtual simulation; public health emergency; reserve nurse; respiratory  
12 infectious disease; COVID-19  
13  
14  
15  
16  
17  
18  
19  
20  
21  
22  
23  
24  
25  
26  
27  
28  
29  
30  
31  
32  
33  
34  
35  
36  
37  
38  
39  
40  
41  
42  
43  
44  
45  
46  
47  
48  
49  
50  
51  
52  
53  
54  
55  
56  
57  
58  
59  
60

For peer review only

### Strengths and limitations of this study:

- This study established a novel emergency nursing training protocol for improving the response capacity of emergency reserve nurses confronting infectious pandemics and epidemics.
- Virtual reality simulation training protocol enables nurses to quickly understand the environment and layout of the infectious department, and be familiar with the patient care process.
- An emergency reserve nursing team which can quickly respond to respiratory epidemic was built based on the virtual reality training which resulted in relatively robust and generalisable results.
- The participants were recruited from one hospital and in a relatively small sample size may limit the reference value of the study.
- In the method, virtual reality training includes some nursing skills practice, so the training time of technical skills of the intervention group is reduced, however, the results show that the training time of technical skills should be increased in the future.



## INTRODUCTION

Respiratory infectious pandemics and epidemics are often highly contagious diseases, affecting large amounts of people. Coronavirus disease 2019 (COVID-19), caused by SARS-CoV-2, has resulted substantial deaths worldwide.<sup>1</sup> The emergency response to the virulent public health crisis has been facing great challenges. As the member of emergency medical team, nurses have played important roles in prevention and treatment of the COVID-19 pandemics. The Emergency reserve nurses play crucial roles in the public health response to pandemics and epidemics.<sup>2</sup>

According to the results, including those of a retrospective research conducted on the SARS-related disaster preparedness among nurse 5 years after the severe acute respiratory syndrome (SARS) pandemic,<sup>3</sup> and the investigations carried out in the United States and other places,<sup>4-8</sup> especially the surveys conducted amid the COVID-19 epidemic,<sup>9-11</sup> the disaster preparedness of clinical nurses was at medium-to-low level, which was largely attributed to the lack of systematic training received on emergency response. Therefore, it is a pressing need to explore how to enhance the training received by nursing staff on the response to pandemic, which is required to improve the overall capabilities of emergency reserve nurses to cope with public health emergency.

Researchers have proposed emergency drill, simulation teaching, desktop maneuvers and other solutions to support health care professionals in gaining more experience in the response to pandemic.<sup>12-14</sup> However, these studies are common in lacking long-term follow-up results. Besides, the organization of simulated emergency drills is costly and difficult for students to practice repeatedly. Due to the abrupt, highly transmissible, and detrimental nature of acute infectious diseases, it is

1  
2  
3  
4 difficult to deliver clinical teaching in the ward. In order to cope with the sudden  
5 outbreak of infectious diseases, there have been many medical institutions putting in  
6 place regular drills for their medical staff according to the exact emergency plans. As  
7 the setting of drill is predetermined and all the patients are role-played, these drills are  
8 ineffective in reflecting the reality and providing practical experience. As a result, the  
9 trainees naturally lack the ability to deal with emergencies,<sup>5 15</sup> particularly, during the  
10 COVID-19 pandemic, there were many problems exposed, e.g., the inability to cope  
11 with emergency and enormous psychological pressure.<sup>16 17</sup>  
12  
13  
14  
15  
16  
17  
18  
19  
20  
21  
22

23  
24 Currently, virtual reality simulation training has been commonly adopted by  
25 schools and hospitals due to such advantages as realistic simulation, intelligence,  
26 interaction, independence, and openness.<sup>18</sup> It is thus conducive to cultivate critical  
27 thinking and clinical decision-making ability for students. At the time of training, the  
28 trainees can log into the system in different roles, which not only facilitates the  
29 training on different professional skills, teamwork and real-time interaction, but also  
30 supports the medical students of different majors in working as a team to provide  
31 treatment and nursing care for patients.<sup>19-22</sup> In China, the virtual reality simulation  
32 program intended for the training on infectious diseases nursing mainly includes the  
33 training on nursing thinking for common infectious diseases and the experimental  
34 program for layout design of infectious diseases zone. However, it is rare for these  
35 programs to cover the knowledge of new infectious disease. The virtual reality  
36 simulation programs on emergency treatment of avian influenza, plague, tuberculosis,  
37 and other respiratory infectious diseases are purposed mainly to train the students on  
38 how to investigate and verify the identified cases after the outbreak of pandemic,  
39 determine its nature and report it, and then conduct epidemic investigation, sampling,  
40 and disinfection and isolation of the scene to contain transmission, etc., which is  
41 usually designed for those students majoring in preventive medicine and public  
42 health.<sup>23</sup> However, these programs do not cover the clinical manifestations, treatment,  
43  
44  
45  
46  
47  
48  
49  
50  
51  
52  
53  
54  
55  
56  
57  
58  
59  
60

1  
2  
3  
4 and care of patients. Moreover, there is no virtual reality simulation program in place  
5  
6 for nursing professionals to make response to the emergencies involving severe  
7  
8 respiratory infectious diseases, while covering the medical condition, treatment, and  
9  
10 care of patients.  
11  
12  
13  
14

15 To improve the capabilities of nurses to respond to public health emergency, this  
16  
17 study constructed 3D virtual reality scenes of isolation ward, incorporated COVID-19  
18  
19 cases in to the training by virtual simulation technology. In immersive learning  
20  
21 environment, the trainees can learn the pre-set theories and practice the technical  
22  
23 skills that are essential to treat and care COVID-19 patients.<sup>24</sup> After the training, the  
24  
25 qualified trainees were selected to build up an emergency reserve nursing team to  
26  
27 respond to epidemic at local city or other cities.  
28  
29  
30  
31  
32  
33  
34  
35  
36  
37  
38  
39  
40  
41  
42  
43  
44  
45  
46  
47  
48  
49  
50  
51  
52  
53  
54  
55  
56  
57  
58  
59  
60

## METHODS

### *Participants*

The study was conducted at a general hospital in Hengyang, Hunan Province, China. From January to March 2020, the hospital treated 80% of the local COVID-19 confirmed patients; and by March 2, all those patients recovered and were discharged from the hospital. Since then, there has been no more newly confirmed COVID-19 case in the region. In May 2020 (two months after the stability of the local epidemic situation), 120 eligible nurses were enrolled in this study and divided into control group and intervention group via a computer-generated random numbers table. All nurses are managed by the Emergency Prep Nurse Training Team of the hospital. When the nurse passed the assessment after training, he/she would be directly selected into the emergency nurse bank of the local public health emergency.

### *Design*

This was a pre-test and post-test quasi-experimental study with a control group.

### *Ethics*

This study was approved by the Ethics Committee of Affiliated Nanhua Hospital, University of South China (2020-ky-49). All subjects were informed of voluntarily participating and could withdraw from the study at any time. The participant's personal information is confidential and can only be accessed by the authors.

### *Patient and Public Involvement statement*

No patients were involved in this study. This study/article focused on a novel training

1  
2  
3  
4 mode with virtual reality technology for nurses dealing with public health  
5 emergencies.  
6  
7  
8  
9

### 10 11 ***Training*** 12

13  
14 From May to July in 2020, the nurses in the control and intervention groups were  
15 trained according to the following program.  
16  
17

#### 18 19 (1) Control group received conventional training. 20

21  
22 A 10-member emergency nursing instructor team was set up, including the  
23 experts in treatment, nursing care, nosocomial infection control, psychological  
24 support, and teaching who had the experience of working on the front-line to fight  
25 against COVID-19. The instructors were responsible for teaching theory, delivering  
26 training on technical skills, and organizing emergency drills. Lasting 3 months, the  
27 training consists of 12 sessions , with 4 class hours each session per week, 48 class  
28 hours in total, including 10 lectures on theoretical aspects for 18 hours in total  
29 (including a test), intensive training and test on 14 technical skills for 18 hours in  
30 total, a 4-hour-long meeting on the sharing of experience in carrying out treatment  
31 amid the COVID-19 pandemic, and an 8-hour-long, twice, emergency drill for  
32 trainees in batches to the plan made for emergency response to the outbreak of  
33 respiratory epidemic. The instructors were divided into two groups for supervision on  
34 exercise and the evaluation of each trainee for their individual performance in each  
35 batch of exercise using the emergency capability rating scale developed for nursing  
36 staff. As for the content of training, it includes the interim clinical guidance intended  
37 for the management of COVID-19 patients, infection control guidance, disinfection,  
38 quarantine, psychological training, as well as the preparation of personal protective  
39 equipment. Especially, much importance is attached to the training on how to practice  
40 self-protection and relieve the psychological stress felt by the patients. The 14 basic  
41 technical skills required for the training include putting on and off personal protective  
42  
43  
44  
45  
46  
47  
48  
49  
50  
51  
52  
53  
54  
55  
56  
57  
58  
59  
60

1  
2  
3  
4 equipment, disinfection and isolation, respiratory tract sampling, cardiopulmonary  
5 resuscitation (CPR), sputum aspiration, oxygen inhalation, aerosol inhalation, tracheal  
6 intubation, mechanical ventilation, etc. The training and assessment plan is detailed in  
7  
8 Appendix.  
9  
10

11  
12  
13  
14  
15 (2) The intervention group received virtual reality simulation training in combination  
16 with technical skills training.  
17  
18

19  
20 With the assistance of computer-based VR equipment, there are 4 scenarios  
21 constructed for this project:  
22  
23

24  
25 Firstly, a team was put in place and the cases were prepared. An instructor team  
26 was set up to deliver virtual reality simulation training, with one teacher enrolled on  
27 the basis of the instructor team of the control group for virtual training and  
28 information technology support. The instructor team was tasked with the selection of  
29 three typical COVID-19 cases after the private details of the patients were removed,  
30 including one severe case of an adult patient, one critical case of an elderly patient  
31 with such complications as diabetes, and one critical case of an eight-year-old child  
32 patient. The whole treatment process carried out in those 3 cases was analyzed, based  
33 on which the commonly used skills, nursing measures, possible difficulties in nursing  
34 care were identified and factored into the cases of virtual reality simulation training.  
35  
36  
37  
38  
39  
40  
41  
42  
43  
44  
45  
46  
47  
48

49 Secondly, the scenario was set and the platform was constructed. There were  
50 four virtual scenes created, including pre-hospital management, fever clinics  
51 reception, intensive care unit, and isolation ward, which is aimed to familiarize the  
52 trainees with different working environments. In the meantime, the cases in the  
53 training system can be used to simulate the real clinical symptoms, clinical  
54 manifestations, disease progression, diagnosis and treatment, nursing care,  
55  
56  
57  
58  
59  
60

1  
2  
3  
4 psychological changes, the standard procedures of disinfection and isolation, etc. The  
5 relevant tasks include application of the guidance for management of patients and  
6 infection control on COVID-19, with all the key elements covered by the virtual  
7 reality training simulation program. (Fig.1).  
8  
9  
10

11  
12  
13  
14  
15 Thirdly, training was delivered. The training lasted 4 h per week for 3 months.  
16

17  
18 Compared with the training plan made for the control group, the lectures focusing on  
19 the theoretical aspects of the conventional training has been adjusted to 18 h scenario  
20 training in the virtual reality system. Besides, the trainees were also required to attend  
21 technical skills training for 12 hours in total. Each session is comprised of virtual  
22 reality practice for 2 hours, the practice of technical skills on multifunctional  
23 simulation/models for 1.5 hours, the recapping and exchanging of views on the  
24 handling of unexpected situations or emergencies, the sharing of nursing experience,  
25 and the discussion on the relevant questions and procedures to the scenarios for 1/2  
26 hour. At the end of the training, 4 hours of psychological training and an 8-hour-long  
27 emergency exercise took place, which was no different to the control group. In their  
28 spare time, the trainees were allowed to make appointment on the hospital virtual  
29 training platform for repeating and reviewing the practices. Each trainee can make  
30 two appointments with 2 instructors under on-spot supervision and have 2 hours  
31 allowed for each practice.  
32  
33  
34  
35  
36  
37  
38  
39  
40  
41  
42  
43  
44  
45  
46  
47  
48  
49

## 50 **Evaluation**

51  
52 Main outcome indicator: The capacity of emergency care scoring: the instructors as  
53 the judge were responsible for evaluating the nurses of the two groups for their  
54 capacity of emergency care before and after the intervention. The design of  
55 emergency capability rating scale intended for nursing staff was based on the study of  
56  
57  
58  
59  
60

1  
2  
3  
4 Wang.<sup>25</sup> It focuses on five dimensions with 100 points in total, including the ability of  
5 occupational protection, disinfection, and quarantine (20), the observation and  
6 judgment of disease (20), the preliminary examination, classification, and treatment of  
7 the patients in severe or critical condition (20), cooperation and coordination (20), as  
8 well as the assessment and management of crisis (20). The higher score the nurse  
9 achieved, the greater the capability of the nursing staff to deal with emergence. Before  
10 adopting the assessment, we predetermined the reliability of the scale. The Cronbach's  
11  $\alpha$  was 0.79, indicating the reliability of the scale is acceptable. Extracting the average  
12 scores of twice drill.  
13  
14  
15  
16  
17  
18  
19  
20  
21  
22  
23  
24  
25  
26  
27

#### 28 Secondary outcome measures:

29  
30  
31 ① Assessment of theory and skills: The nurses in the two groups were assessed for  
32 their relevant theoretical knowledge and skills before and after the intervention. The  
33 theoretical examination was conducted through MCQ test.<sup>26</sup> The skill assessment was  
34 completed on site during the practice class. Each trainee was allowed to make two  
35 attempts during the skill assessment, with the higher one achieved in the two attempts  
36 taken as the assessment result.  
37  
38  
39  
40  
41  
42  
43  
44  
45  
46  
47

48 ② The Chinese version of Disaster Preparedness Evaluation Tool (DPET): this scale  
49 was applied to assess the nursing staff for their preparedness for possible pandemic.  
50 Proposed by LI,<sup>27</sup> the scale was translated and adjusted culturally from Tichy's  
51 scale.<sup>28</sup> The Cronbach's  $\alpha$  coefficient was set to 0.865, involving 45 items of three  
52 dimensions: the knowledge about disaster (13 items), the skills regarding disaster (11  
53 items) and post disaster management (21 items). The scale covers risk reduction,  
54 disease prevention and health promotion, policy making and development, ethics,  
55  
56  
57  
58  
59  
60



1  
2  
3  
4 legal practices and liabilities, communication and information sharing, the education  
5 about and preparedness for disaster, community care, individual and home care,  
6 psychological care, the care for vulnerable groups, the long-term rehabilitation of  
7 individual, family, and community, etc, so as to fully reflect the state of disaster  
8 preparedness among the nursing staff. The items were scored 1 ~ 6 points from  
9 "strongly disagree" to "strongly agree." The higher the score was, the more prepared  
10 the nursing staff were.  
11  
12  
13  
14  
15  
16  
17  
18  
19  
20  
21  
22

### 23 **Statistical Analysis**

24  
25  
26 All data were input into SPSS 18.0 and were statistical analyzed. The *p-value* less  
27 than 0.05 was considered statistically significant.  
28  
29  
30  
31  
32  
33  
34  
35  
36  
37  
38  
39  
40  
41  
42  
43  
44  
45  
46  
47  
48  
49  
50  
51  
52  
53  
54  
55  
56  
57  
58  
59  
60

## RESULTS

### (1) Demographic Data

Table 1 presents the demographic data comparison between the two groups of participants. The majority of the 120 subjects in this study were women (control group: 91.7%, intervention group: 88.3%).

The differences in gender, age, highest degree, and work experience between the two groups were not statistically significant ( $p > 0.05$ ) and were comparable.

**Table 1 Demographic Data(N =120)**

| Variable                   | Control group | Intervention group | <i>t/χ<sup>2</sup></i> | <i>P-value</i> |
|----------------------------|---------------|--------------------|------------------------|----------------|
|                            | (n=60)        | (n=60)             |                        |                |
|                            | n (%)         | n (%)              |                        |                |
| <b>Gender</b>              |               |                    |                        |                |
| Male                       | 5 (8.3)       | 7 (11.7)           | 0.093                  | 0.761          |
| Female                     | 55 (91.7)     | 53 (88.3)          |                        |                |
| <b>Age</b>                 |               |                    |                        |                |
| ≤30 years old              | 29 (48.3)     | 28 (46.7)          | 0.255                  | 0.754          |
| 31-39 years old            | 24 (40.0)     | 24 (40.0)          |                        |                |
| ≥40 years old              | 7 (11.7)      | 8 (13.3)           |                        |                |
| <b>Clinical experience</b> |               |                    |                        |                |
| ≤5 years                   | 26 (43.3)     | 23 (38.3)          | 0.111                  | 0.912          |
| 6-14 years                 | 21 (35.0)     | 25 (41.7)          |                        |                |
| ≥15 years                  | 13 (21.7)     | 12 (20.0)          |                        |                |

|                                                      |           |           |       |       |
|------------------------------------------------------|-----------|-----------|-------|-------|
| Highest degree                                       |           |           |       |       |
| Diploma/associate degree                             | 11 (18.3) | 10 (16.7) |       |       |
| Bachelor's degree                                    | 40 (66.7) | 41 (68.3) | 0.060 | 0.970 |
| Master's degree                                      | 9 (15.0)  | 9 (15.0)  |       |       |
| Professional title                                   |           |           |       |       |
| Primary                                              | 29 (48.3) | 29 (48.3) |       |       |
| Intermediate                                         | 21 (35.0) | 21 (35.0) | 0.165 | 0.921 |
| Senior                                               | 10 (16.7) | 10 (16.7) |       |       |
| Work experience in Emergency/Intensive care unit     |           |           |       |       |
| Yes                                                  | 22 (36.7) | 23 (38.3) |       |       |
| No                                                   | 38 (63.3) | 37 (61.7) | 0.036 | 0.850 |
| Work experience in infectious departments            |           |           |       |       |
| Yes                                                  | 21 (35.0) | 23 (38.3) |       |       |
| No                                                   | 39 (65.0) | 37 (61.7) | 0.144 | 0.705 |
| Experience of caring for patients with COVID-19/SARS |           |           |       |       |
| Yes                                                  | 15 (25.0) | 17 (28.3) |       |       |
| No                                                   | 45 (75.0) | 43 (71.7) | 0.170 | 0.680 |
| Hospital department of work                          |           |           |       |       |
| Medical ward                                         | 19 (31.7) | 19 (31.7) |       |       |
| Surgical ward                                        | 14 (23.3) | 15 (25.0) |       |       |
| Emergency department                                 | 8 (13.3)  | 7 (11.7)  |       |       |
| Intensive care unit                                  | 8 (13.3)  | 9 (15.0)  |       |       |
| Pediatrics department                                | 5 (8.3)   | 5 (8.3)   | 0.270 | 0.998 |
| Others                                               | 6 (10.0)  | 5 (8.3)   |       |       |

**(2) Comparison of the DPET scores between groups before and after intervention**

Prior to intervention, there was no significant difference found in the score of disaster preparedness between the two groups ( $p > 0.05$ , Table 2). After intervention, however, the total score of disaster preparedness among the intervention group was significantly higher than among the control group ( $p < 0.001$ , Table 2). The scores of knowledge regarding disaster and skills regarding disaster in the intervention group were significantly higher than in the control group ( $p < 0.001$ , Table 2), while the scores of post disaster management showed no statistical significance between the groups ( $p > 0.05$ , Table 2).

**Table 2 Comparison of the DPET scores between groups before and after intervention (N=120)**

|                              | Control group<br>(n=60) | Intervention group<br>(n=60) | t     | P-value          |
|------------------------------|-------------------------|------------------------------|-------|------------------|
|                              | (M±SD)                  | (M±SD)                       |       |                  |
| Knowledge regarding disaster |                         |                              |       |                  |
| Pre-intervention             | 101.73±17.94            | 104.38±14.47                 | 0.891 | 0.375            |
| Post-intervention            | 122.00±12.79            | 131.22±6.99                  | 4.900 | <b>&lt;0.001</b> |
| Skills regarding disaster    |                         |                              |       |                  |
| Pre-intervention             | 52.20±10.52             | 51.55±8.72                   | 0.369 | 0.713            |
| Post-intervention            | 69.42±7.89              | 75.95±4.52                   | 5.566 | <b>&lt;0.001</b> |

|                          |              |              |       |                  |
|--------------------------|--------------|--------------|-------|------------------|
| Post disaster management |              |              |       |                  |
| Pre-intervention         | 24.08±5.68   | 23.82±4.68   | 0.281 | 0.779            |
| Post-intervention        | 27.47±4.77   | 28.05±3.26   | 0.782 | 0.436            |
| Total score              |              |              |       |                  |
| Pre-intervention         | 178.02±30.60 | 179.75±20.23 | 0.366 | 0.715            |
| Post-intervention        | 218.88±21.34 | 235.22±10.75 | 5.295 | <b>&lt;0.001</b> |

Bold type p values represent significant values.

SD: standard deviation, using t (t test).

### (3) Comparison of the scores of theoretical and skill assessments and the capacity of emergency care before and after intervention

There was no significant difference observed in the scores of theoretical and skill assessments or the capacity of emergency care between the two groups before intervention ( $p > 0.05$ , Table 3). After intervention, however, both the score of theoretical assessment and that for the capacity of emergency care were improved for the two groups. The scores of theoretical assessment and that for the capacity of emergency care were significantly higher among the intervention group than among the control group ( $p < 0.001$ , Table 3), while the score of technical skills was slightly higher for the control group than for the intervention group ( $p < 0.01$ , Table 3).

**Table 3 Comparison of the scores of theoretical and skill assessments and the capacity of emergency care between groups before and after intervention (N=120)**

|  | Control group | Intervention group | t | P-value |
|--|---------------|--------------------|---|---------|
|--|---------------|--------------------|---|---------|

|                                   | (n=60)     | (n=60)     |       |                   |
|-----------------------------------|------------|------------|-------|-------------------|
|                                   | (M±SD)     | (M±SD)     |       |                   |
| <b>Theoretical assessment</b>     |            |            |       |                   |
| Pre-intervention                  | 65.12±7.04 | 65.62±7.16 | 0.386 | 0.700             |
| Post-intervention                 | 82.92±4.55 | 86.62±3.91 | 4.783 | <b>&lt;0.001</b>  |
| <b>Technical skills</b>           |            |            |       |                   |
| Pre-intervention                  | 71.13±4.57 | 71.77±5.66 | 0.035 | 0.972             |
| Post-intervention                 | 90.35±3.38 | 88.47±4.19 | 2.708 | <b>0.008</b>      |
| <b>Capacity of emergency care</b> |            |            |       |                   |
| Pre-intervention                  | 63.10±7.23 | 63.93±6.65 | 0.657 | 0.516             |
| Post-intervention                 | 81.97±4.45 | 85.35±3.93 | 4.416 | <b>&lt; 0.001</b> |

Bold type p values represent significant values.

## DISCUSSION

In this quasi-experimental study, we evaluated the effectiveness of a novel virtual simulation training in reserve nurses for pandemic respiratory infectious disease. One hundred and twenty reserve nurses participated in the training program and completed both the pre- and post-test measures comprised the sample for this study. All the participants were Chinese clinical nurses who volunteered to be the emergency reserve nurses for public health emergencies. The results of this study showed that the virtual simulation technology in combination with technical skill training significantly improved the respiratory infectious emergency preparedness of reserve nurses. The theoretical assessment and emergency rescue capability scores of the intervention group significantly increased compared to the nurses in the traditional training group after intervention ( $p < 0.001$ ). These findings indicate a critical need for virtual simulation training for reserve nurse training before they go to the respiratory infectious disease front line.

Different from the conventional form of training, this novel virtual reality simulation training provides simulated isolation ward. The training is flexible and capable to create real-world settings. Thus, it is convenient for the trainees to get familiar fast with the special layout of zone, the working environment and the standard procedure. These are extremely important for the emerging infectious diseases. Compared with other virtual simulation programs,<sup>29-31</sup> we selected typical cases of COVID-19 in our program. Since the COVID-19 has not subsided yet worldwide. It is a hard and longtime work to deal with the epidemic. Thus, it is crucial important to train the theory, technical skills, and knowledge of emergency drills about COVID-19 for emergency reserve nurses, so as to help them quickly master the essentials, adapt to the work context, improve the emergency rescue ability. The program simulated the clinical manifestations, disease progression,

1  
2  
3  
4 psychosocial problems of COVID-19 patients, as well as diagnosis and treatment,  
5 nursing care, standard procedures of disinfection and isolation. In the immersive  
6 learning environment, the trainees can learn the theories and practice the technical  
7 skills, which are essential to treat and care COVID-19 patients. What's more, this  
8 program can prevent the reserve nurses from directly contacting COVID-19 patients,  
9 thus reducing the risk of infection and ensuring the safety of the trainees. In addition,  
10 the reserve nurses can define their job responsibilities, engage with  
11 learning proactively and develop the confidence of practice through this novel  
12 training. They can also improve their capabilities of emergency response during the  
13 training, as various unexpected scenarios in the nursing work were pre-set in the  
14 training cases, such as patient with sudden suffocation or severe hypoxia, and restless,  
15 refusing to cooperate with treatment, and so on. This simulation training program also  
16 has the mode of team/group training, which mobilizes the nurses  
17 rapidly to collaborate with other team members in completing their own tasks.  
18 Since this training program has been included as part of the virtual teaching platform  
19 operated by the hospital, the trainees can make appointment for repeating and  
20 reviewing what they have learned during their spare time, which breaks the time and  
21 spatial limits of conventional in-person training delivered.  
22  
23  
24  
25  
26  
27  
28  
29  
30  
31  
32  
33  
34  
35  
36  
37  
38  
39  
40  
41  
42

43 Similarly, Many studies reported the effectiveness of virtual reality simulation  
44 training ( VRS ) in medical/nursing training.<sup>20 30-34</sup> Luca Ragazzoni, et al.<sup>35</sup> used  
45 VRS to train medical staff on the operational public health skills related to the  
46 infection control and Ebola treatment management. They proposed a model of the  
47 VRS in combination with hybrid skills training exercises. Finally they found that the  
48 hybrid approach can effectively raise the educational target level from a level of  
49 understanding to a level of training. Therefore, in our study, reserve nurses in the  
50 intervention group received virtual reality simulation training in combination with  
51 technical skills training. Sparkes L, et al.<sup>31</sup> trialed an online simulation program for  
52  
53  
54  
55  
56  
57  
58  
59  
60



1  
2  
3  
4 the management of deteriorating patients and found it can significantly improve  
5 knowledge, skills, self-rating of performance, confidence, and competence of nursing  
6 students. In Iran, Tahereh Najafifi Ghezljeh, et al.<sup>29</sup> used the virtual social network  
7 education to improve the knowledge and attitude related to emergency preparedness  
8 of emergency nurses. These were partly similar to our research, but these studies have  
9 not been applied to the training of epidemic response. However, some studies have  
10 different results. Abeer William, et al.<sup>36</sup> indicated that in phlebotomy training, there  
11 was no significant difference between the VRS and the traditional method (simulated  
12 limbs). In another study,<sup>37</sup> researchers found that VRS increased nursing students'  
13 knowledge but did not significantly contribute to improved skill performance.  
14  
15  
16  
17  
18  
19  
20  
21  
22  
23  
24  
25  
26

27 After the intervention, the score of technical skill for the control group  
28 (90.35±3.38) was slightly higher than for the intervention group (88.47±4.19)  
29 (p<0.01). As for the differences between the two groups, one reason may be that the  
30 technical skills training time of the intervention group getting reduced by 1/3 as  
31 compared to the control group. Alternately, it may also be related to the fact that the  
32 trainees got more accustomed to the traditional way of skill practice. Therefore, our  
33 plan for the future training is to extend skills training time for the virtual simulation  
34 group by 1/3, to the same level as the control group. It is essential that more attention  
35 is brought to ensuring balance between virtual training and conventional training.<sup>38-40</sup>  
36 In addition, it was found out that the scores of post disaster management were low for  
37 the nurses in the two groups before intervention. After intervention, however, the  
38 scores were only slightly improved for both groups, with no statistical difference  
39 observed between these two groups (p>0.05). This finding demonstrated that the  
40 emergency reserve nurses in the region currently lacked the knowledge of  
41 post-traumatic stress, suggesting the need for our training program to prioritize  
42 post-traumatic recovery of our nurses in the future.  
43  
44  
45  
46  
47  
48  
49  
50  
51  
52  
53  
54  
55  
56  
57  
58  
59  
60

## Limitations

There are some limitations faced by our study. Firstly, the sample size of the study was small, as all of the participants came from the same hospital, thus restricting the reference value of the study. Secondly, due to the limit of resources, the virtual scene of mobile cabin hospital was not constructed under the virtual training program, which will be carried out in the future study. Thirdly, the time of skill training needs to be extended, as there was a lack of attention paid to the training related to post-disaster care and post-traumatic recovery, which should be improved in the future.

## CONCLUSION

As for the training on the pandemic response of reserve nurses, the virtual reality simulation training in combination with technical skills training is effective in achieving better outcomes than the conventional training. This novel model of training shows more advantages in improving the theoretical knowledge, the capacity of emergency care, the preparedness for pandemic, and the response capacity of pandemic, which makes it applicable as a new approach to the emergency training in medical institutions for better response to public emergencies. In the future, we can optimize our training model by integrating simulator-based training with that in the 3D virtual environment, so as to give full play to their respective advantage, thus improving the overall clinical capabilities of nurses. Besides, we can explore the virtual reality team training for interdisciplinary cooperation. We also hope to provide the training for other universities and hospitals based on the virtual experiment project platform in China, and even for the institutes outside of China.

1  
2  
3  
4 **Acknowledgements** We would like to thank all participants in this study and the staff  
5  
6 from the Clinical Simulation Center in the University of South China.  
7  
8  
9

10  
11 **Contributors** DZ and YZ designed the study. HL, PH, DW and WY helped develop  
12  
13 the study measures and data collection. WY and YC contributed to study delivery,  
14  
15 interpretation of the data. DZ, YJ and YZ wrote the manuscript and all authors read  
16  
17 the final manuscript and approved its submission.  
18  
19  
20

21  
22 **Funding** This study was partially supported by the grants from Shaanxi Province  
23  
24 (SGH140537), the Xi'an Jiaotong University Fund, the Fund of Hunan Social Science  
25  
26 Achievement Appraisal Committee (XSP21YBC228), the Hunan Anti-COVID-19  
27  
28 Special Project (2020SK3040), and the fund of innovative program on the COVID-19  
29  
30 prevention and treatment from Hengyang Science and Technology Bureau  
31  
32 (202010031581).  
33  
34  
35  
36  
37

38 **Data availability statement** All data relevant to the study are included in the article  
39  
40 or uploaded as supplementary information.  
41  
42  
43  
44  
45  
46  
47  
48  
49  
50  
51  
52  
53  
54  
55  
56  
57  
58  
59  
60

1  
2  
3  
4  
5  
6  
7  
8  
9  
10  
11  
12  
13  
14  
15  
16  
17  
18  
19  
20  
21  
22  
23  
24  
25  
26  
27  
28  
29  
30  
31  
32  
33  
34  
35  
36  
37  
38  
39  
40  
41  
42  
43  
44  
45  
46  
47  
48  
49  
50  
51  
52  
53  
54  
55  
56  
57  
58  
59  
60

For peer review only

## REFERENCES

1. Johns Hopkins Coronavirus Resource Center <https://coronavirus.jhu.edu/map.html>2020 [accessed 10, August, 2020].
2. Fernandez R, Lord H, Halcomb E, et al. Implications for COVID-19: A systematic review of nurses' experiences of working in acute care hospital settings during a respiratory pandemic. *Int J Nurs Stud* 2020;111:103637. doi: 10.1016/j.ijnurstu.2020.103637 [published Online First: 2020/09/13]
3. O'Sullivan TL, Dow D, Turner MC, et al. Disaster and emergency management: Canadian nurses' perceptions of preparedness on hospital front lines. *Prehosp Disaster Med* 2008;23(3):s11-8. [published Online First: 2008/08/16]
4. Hodge AJ ME, Dilts Skaggs MK. Nursing self-perceptions of emergency preparedness at a rural hospital. *J Emerg Nurs* 2017;43:10-14. doi: 10.1016/j.jen.2015.07.012
5. Usher K MJ, West C, et al. Cross-sectional survey of the disaster preparedness of nurses across the Asia-Pacific region. *Nurs & Health Sci* 2015;17:434-43. doi: 10.1111/nhs.12211
6. Seher Deniz ÖZTEKIN EEL, Makoto AKAHOSHI, et al. Japanese nurses' perception of their preparedness for disasters: Quantitative survey research on one prefecture in Japan. *Japan Journal of Nursing Science* 2016;13:391-401. doi: 10.1111/jjns.12121
7. Taskiran G, Baykal, U. Nurses' Disaster Preparedness and Core Competencies in Turkey: A Descriptive Correlational Design. *Int Nurs Rev* 2019;66:165-75. doi: 10.1111/inr.12501
8. Xiao-Hua XU, Sheng Y, Zhen LI, et al. A cross-sectional survey of the disaster preparedness of nurses in China. *Chinese Journal of Nursing*, 2016;5. DOI:10.3761/j.issn.0254-1769.2016.08.002.
9. Jinlei BAO BS, Hui ZHANG, et al. Investigation on disaster preparedness of clinical nurses going to Wuhan to fight against epidemic diseases in Jilin province. *Chinese Nursing Research* 2020;34:938-40. doi: 10.12102/j.issn.1009-6493.2020.06.003
10. Huiping WANG FZ, Weihong LIU, et al. A survey on the disaster preparedness of clinical nurses in epidemic period of novel coronavirus pneumonia. *Journal of Nursing Administration* 2020;20:229-33. doi: 10.3969/j.issn.1671-315x.2020.04.001
11. LIU Chunzi YY, LIU Huijuan, et al. Disaster preparedness of nurses in three COVID-19 designated hospitals in Beijing and its influencing factors: A cross-sectional study. *Academic Journal of Chinese Medical School* 2020;41:237-41. doi: 10.3969/j.issn.2095-5227.2020.03.010

12. Hsu SM, Chien LJ, Tseng SH, et al. A No-Notice Drill of Hospital Preparedness in Responding to Ebola Virus Disease in Taiwan. *Health Secur* 2015;13(5):339-44. doi: 10.1089/hs.2015.0022 [published Online First: 2015/09/19]
13. Vinson E. Managing bioterrorism mass casualties in an emergency department: lessons learned from a rural community hospital disaster drill. *Disaster Manag Response* 2007;5(1):18-21. doi: 10.1016/j.dmr.2006.11.003 [published Online First: 2007/02/20]
14. Adams JJ, Lisco SJ. Ebola: Urgent Need, Rapid Response. *Simul Healthc* 2016;11(2):72-4. doi: 10.1097/SIH.000000000000158 [published Online First: 2016/04/05]
15. Achora S, Kamanyire JK. Disaster Preparedness: Need for inclusion in undergraduate nursing education. *Sultan Qaboos Univ Med J* 2016;16(1):e15-9. doi: 10.18295/squmj.2016.16.01.004 [published Online First: 2016/02/26]
16. Perez-Raya F, Cobos-Serrano JL, Ayuso-Murillo D, et al. COVID-19 impact on nurses in Spain: a considered opinion survey. *Int Nurs Rev* 2021;68(2):248-55. doi: 10.1111/inr.12682 [published Online First: 2021/05/19]
17. Tosun AS, Gündodu N, Ta F. Anxiety Levels and Solution - Focused Thinking Skills of Nurses and Midwives Working in Primary Care during the COVID - 19 Pandemic: A Descriptive Correlational Study. *Journal of Nursing Management* 2021 doi: 10.1111/jonm.13334
18. Rutherford-Hemming T, Alfes CMJCSiN. The Use of Hospital-Based Simulation in Nursing Education—A Systematic Review. 2017
19. Labrague LJ, Hammad K, Gloe DS, et al. Disaster preparedness among nurses: a systematic review of literature. *Int Nurs Rev* 2018;65(1) :41-53.
20. Khanal P VA, Ashby A, et al. Collaborative virtual reality based advanced cardiac life support training simulator using virtual reality principles. *J Biomed Inform* 2014;51:49-59. doi: 10.1016/j.jbi.2014.04.005
21. Youngblood P HP, Srivastava S, et al. Design, development, and evaluation Of an online virtual emergency department for training trauma teams. *Simul Healthc* 2008;3(3):146-53. doi: 10.1097/SIH.0b013e31817bedf7
22. Liaw SY OS, Rusli KDB , et al. Nurse-Physician Communication Team Training in Virtual Reality Versus Live Simulations: Randomized Controlled Trial on Team Communication and Teamwork Attitudes. *Journal of Medical Internet Research* 2020;22(4) doi: 10.2196/17279
23. National virtual simulation experiment teaching sharing platform experiment space: <http://www.ilab-x.com/details/v4?id=4809&isView=true>; 2019 [accessed 30, Aug 2019].

- 1  
2  
3  
4 24. Derya Uzelli Yilmaz SHT, Yusuf Yilmaz. Nursing Education in the Era of Virtual Reality 2020.  
5  
6 25. Wang YL, Liu YLT. The survey about the knowledge level of emergency treatment during the  
7  
8  
9  
10  
11  
12 26. Iqbal Z, Saleem K, Arshad HM. Measuring teachers' knowledge of student assessment:  
13  
14  
15  
16  
17 27. Zhen LI, Sheng Y. An investigation of emergency nurses' preparedness for disasters in China.  
18  
19  
20  
21 28. Tichy MB, A.E. & Beckstrand, Renea & Heise, Barbara. Nurse practitioners' perception of disaster  
22  
23  
24  
25 29. Najafi Ghezeljeh TMA, J. Haghani, H. et al. Effect of education using the virtual social network on  
26  
27  
28  
29  
30  
31 30. Kyaw BM, Saxena N, Posadzki P, et al. Virtual Reality for Health Professions Education: Systematic  
32  
33  
34  
35  
36  
37 31. Sparkes L, Chan MM, Cooper S, et al. Enhancing the management of deteriorating patients with  
38  
39  
40  
41  
42  
43  
44 32. Verkuyl M, Lapum JL, St-Amant O, et al. Curricular uptake of virtual gaming simulation in nursing  
45  
46  
47  
48  
49 33. Harmon J, Pitt V, Summons P, et al. Use of artificial intelligence and virtual reality within clinical  
50  
51  
52  
53  
54  
55 34. Hauze SW, Hoyt HH, Frazee JP, et al. Enhancing Nursing Education Through Affordable and  
56  
57  
58  
59  
60



- 1  
2  
3  
4 35. Ragazzoni L, Ingrassia PL, Echeverri L, et al. Virtual Reality Simulation Training for Ebola  
5 Deployment. *Disaster Med Public Health Prep* 2015;9(5):543-6. doi: 10.1017/dmp.2015.36  
6 [published Online First: 2015/03/19]  
7  
8  
9 36. Abeer William VLV, Pamela John. Traditional Instruction versus Virtual Reality Simulation: A  
10 Comparative Study of Phlebotomy Training among Nursing Students in Kuwait. *Journal of*  
11 *Education and Practice* 2016;7:18-25.  
12  
13  
14 37. Gu Y, Zou Z, Chen X. The Effects of vSIM for Nursing as a Teaching Strategy on Fundamentals of  
15 Nursing Education in Undergraduates. *Clinical Simulation in Nursing* 2017;13(4):194–97. doi:  
16 10.1016/j.ecns.2017.01.005  
17  
18  
19 38. McWilliams LA, Malecha A. Comparing Intravenous Insertion Instructional Methods with Haptic  
20 Simulators. *Nurs Res Pract* 2017;2017:4685157. doi: 10.1155/2017/4685157 [published  
21 Online First: 2017/03/03]  
22  
23  
24 39. Jung EY, Park DK, Lee YH, et al. Evaluation of practical exercises using an intravenous simulator  
25 incorporating virtual reality and haptics device technologies. *Nurse Educ Today*  
26 2012;32(4):458-63. doi: 10.1016/j.nedt.2011.05.012 [published Online First: 2011/06/15]  
27  
28  
29 40. Mabry J, Lee E, Roberts T, et al. Virtual Simulation to Increase Self-efficacy Through Deliberate  
30 Practice. *Nurse Educator* 2020;45(4):202-05. doi: 10.1097/nne.0000000000000758  
31  
32  
33  
34  
35  
36  
37  
38  
39  
40  
41  
42  
43  
44  
45  
46  
47  
48  
49  
50  
51  
52  
53  
54  
55  
56  
57  
58  
59  
60

1  
2  
3  
4 **Fig.1** Design of virtual simulation training platform for emergency response of  
5  
6 respiratory infectious diseases  
7  
8  
9  
10  
11  
12  
13  
14  
15  
16  
17  
18  
19  
20  
21  
22  
23  
24  
25  
26  
27  
28  
29  
30  
31  
32  
33  
34  
35  
36  
37  
38  
39  
40  
41  
42  
43  
44  
45  
46  
47  
48  
49  
50  
51  
52  
53  
54  
55  
56  
57  
58  
59  
60

For peer review only

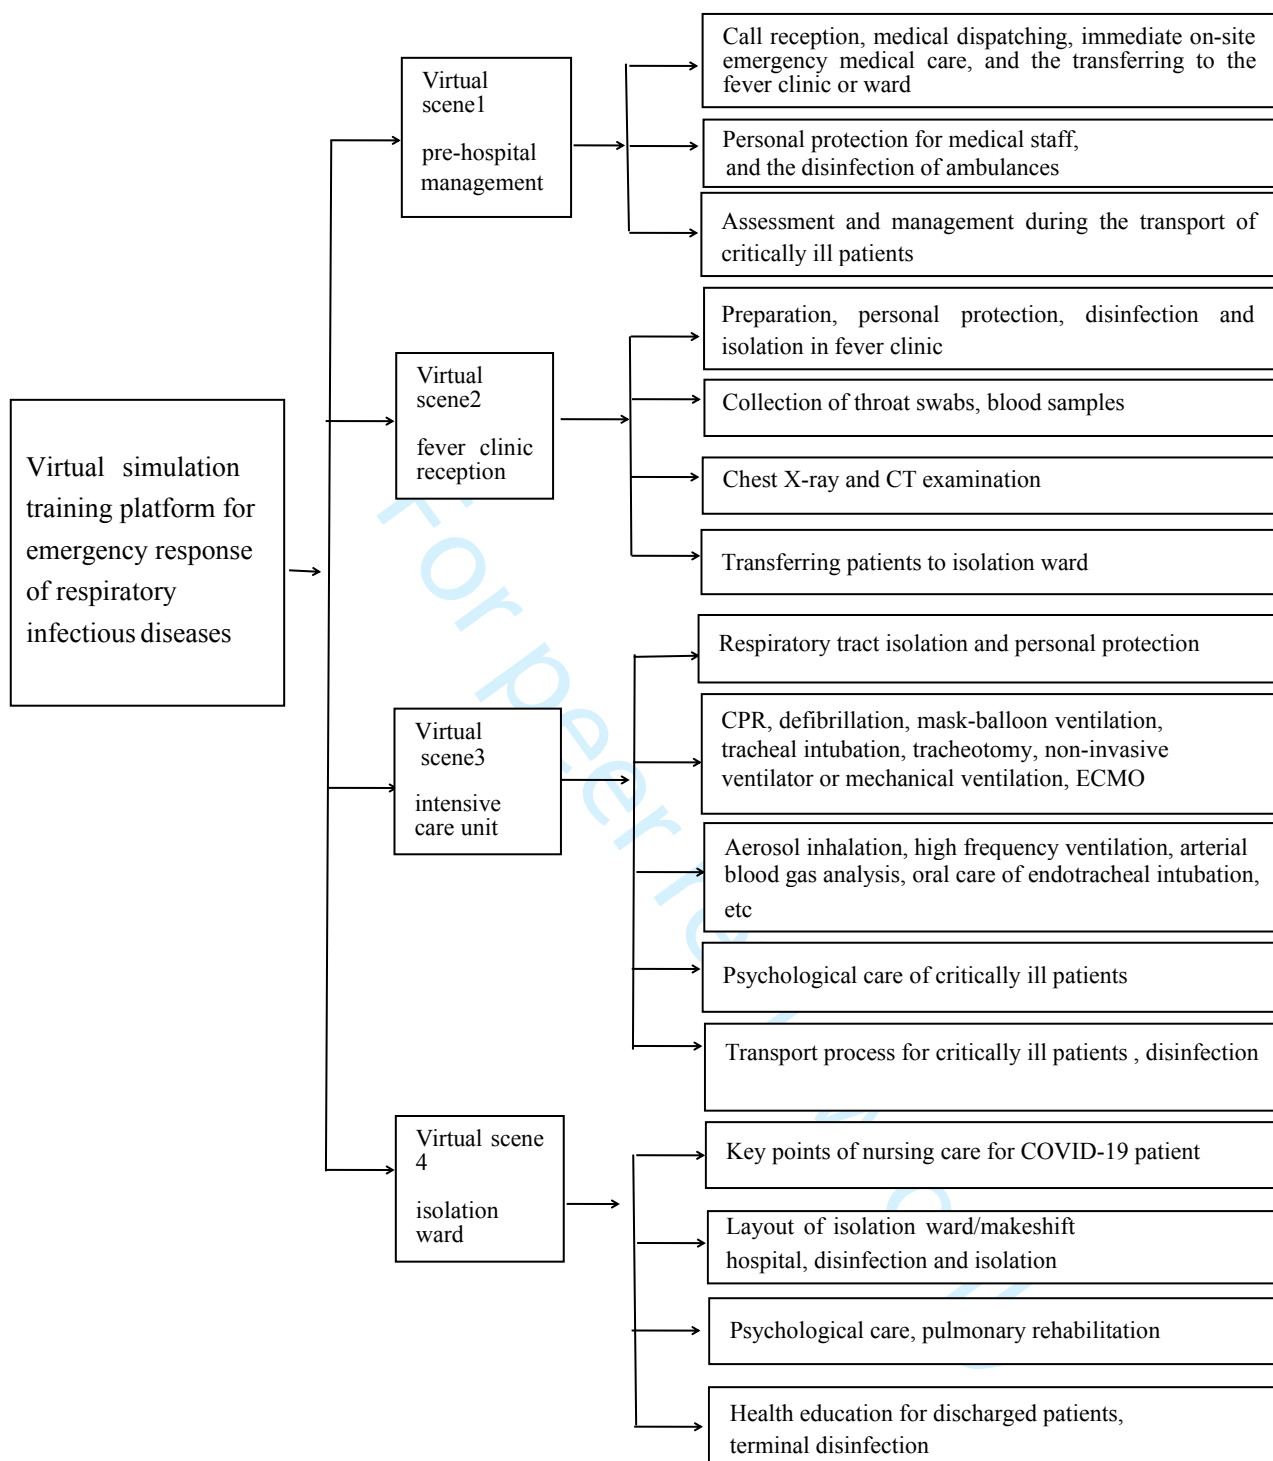

**Fig.1** Design of virtual simulation training platform for emergency response of respiratory infectious diseases

## Appendix:

## The traditional training and assessment plan of the control group

| Month        | Content and class hours |                                                                                                                                                                                                                                                                                                                          |
|--------------|-------------------------|--------------------------------------------------------------------------------------------------------------------------------------------------------------------------------------------------------------------------------------------------------------------------------------------------------------------------|
| First Month  | Session 1               | <p><b>Lecture (2 h):</b> clinical guidance intended for the management of COVID-19 patients, infection control guidance, and the key points of nursing care</p> <p><b>Practical skill (2 h):</b> demonstration and practice in teams on respiratory tract sampling, putting on and off personal protective equipment</p> |
|              | Session 2               | <p><b>Lecture (2 h):</b> disinfection, quarantine, and nosocomial infection control</p> <p><b>Practical skill (2 h):</b> review and assess the practical skills learned in the last session</p>                                                                                                                          |
|              | Session 3               | <p><b>Lecture (2 h):</b> Guidelines for the treatment and care of the COVID-19 patients in critically condition (I)</p> <p><b>Practical skill (2 h):</b> demonstration and practice in teams on CPR, sputum aspiration, oxygen inhalation, simple respirator operation</p>                                               |
|              | Session 4               | <p><b>Lecture (2 h):</b> Guidelines for the treatment and care of the COVID-19 patients in critically condition (I)</p> <p><b>Practical skill (2 h):</b> demonstration and practice in teams on arterial puncture and venipuncture, trachea cannula, defibrillator operation</p>                                         |
| Second Month | Session 1               | <p><b>Lecture (2 h):</b> psychological nursing of patients</p> <p><b>Practical skill (2 h):</b> review and assess the practical skills of CPR, sputum aspiration, oxygen inhalation, simple respirator operation</p>                                                                                                     |
|              | Session 2               | <p><b>Lecture (2 h):</b> trainees' psychological support, relax training, relieving stress, and releasing negative emotions</p> <p><b>Practical skill (2 h):</b> review and assess the practical skills of arterial puncture and venipuncture, trachea cannula, defibrillator operation</p>                              |
|              | Session 3               | <p><b>Lecture (2 h):</b> preparation of common epidemic prevention materials, basic life support and advanced life support (I)</p> <p><b>Practical skill (2 h):</b> practicing material preparation, high-frequency ventilation support, aerosol inhalation</p>                                                          |
|              | Session 4               | <p><b>4 h:</b> a meeting on experience sharing with the professionals working on the front-line of treating COVID-19</p>                                                                                                                                                                                                 |
| Third Month  | Session 1               | <p><b>Lecture (2h):</b> basic life support and advanced life support (II)</p> <p><b>Practical skill (2h):</b> review and assess the practical skills of high-frequency ventilation support, aerosol inhalation</p>                                                                                                       |
|              | Session 2               | <p><b>Lecture (2h):</b> test on theories</p>                                                                                                                                                                                                                                                                             |

|  |                  |                                                                                                                                                                                                                                                                                                                                                                                                                         |
|--|------------------|-------------------------------------------------------------------------------------------------------------------------------------------------------------------------------------------------------------------------------------------------------------------------------------------------------------------------------------------------------------------------------------------------------------------------|
|  |                  | <b>Practical skill (2h):</b> demonstration and assessment of ventilators(the ICU nurse needs to attend the assessment, while others only need to learn but no test requirements)                                                                                                                                                                                                                                        |
|  | <b>Session 3</b> | Emergency Drill, the emergency procedures for responding to respiratory epidemic, practice and exercise in two groups after explaining the procedures and plan (3 h)<br>Recapping and exchanging of views after exercise (0.5 h)<br>Fill the scale of disaster preparedness, explain the grading criteria of the emergency response capability assessment (0.5 h)                                                       |
|  | <b>Session 4</b> | Twice emergency response exercise for two groups (4 h): the contents of the twice exercises are the same, with 30 trainees in each. Each trainee is designated one role. In the second exercise, the trainee should play a different role.<br>The instructors should be divided into two groups to supervise the exercise and evaluate each trainee's performance with the emergency nursing capacity evaluation sheet. |

# BMJ Open

## Effect of virtual reality simulation training on the response capability of public health emergency reserve nurses in China: a quasi-experimental study

|                                 |                                                                                                                                                                                                                                                                                                                                                                                                                                                                                                                                                                                                                                                                                            |
|---------------------------------|--------------------------------------------------------------------------------------------------------------------------------------------------------------------------------------------------------------------------------------------------------------------------------------------------------------------------------------------------------------------------------------------------------------------------------------------------------------------------------------------------------------------------------------------------------------------------------------------------------------------------------------------------------------------------------------------|
| Journal:                        | <i>BMJ Open</i>                                                                                                                                                                                                                                                                                                                                                                                                                                                                                                                                                                                                                                                                            |
| Manuscript ID                   | bmjopen-2021-048611.R2                                                                                                                                                                                                                                                                                                                                                                                                                                                                                                                                                                                                                                                                     |
| Article Type:                   | Original research                                                                                                                                                                                                                                                                                                                                                                                                                                                                                                                                                                                                                                                                          |
| Date Submitted by the Author:   | 17-Aug-2021                                                                                                                                                                                                                                                                                                                                                                                                                                                                                                                                                                                                                                                                                |
| Complete List of Authors:       | ZHANG, Dandan; Xi'an Jiaotong University, Health science center, School of Nursing<br>LIAO, Hongwu; University of South China Affiliated Nanhua Hospital<br>JIA, Yitong; Xi'an Jiaotong University, Health science center, School of Nursing<br>YANG, Wenren; University of South China Affiliated Nanhua Hospital<br>HE, Pingping; University of South China, School of Nursing<br>WANG, Dongmei; University of South China Affiliated Nanhua Hospital<br>CHEN, Yongjun; University of South China Affiliated Nanhua Hospital<br>YANG, Wei; University of South China Affiliated Nanhua Hospital<br>ZHANG, Yin-Ping ; Xi'an Jiaotong University, Health Science Center, School of Nursing |
| <b>Primary Subject Heading</b>: | Nursing                                                                                                                                                                                                                                                                                                                                                                                                                                                                                                                                                                                                                                                                                    |
| Secondary Subject Heading:      | Infectious diseases, Nursing, Public health, Medical education and training                                                                                                                                                                                                                                                                                                                                                                                                                                                                                                                                                                                                                |
| Keywords:                       | Public health < INFECTIOUS DISEASES, INFECTIOUS DISEASES, Health & safety < HEALTH SERVICES ADMINISTRATION & MANAGEMENT, EDUCATION & TRAINING (see Medical Education & Training), COVID-19                                                                                                                                                                                                                                                                                                                                                                                                                                                                                                 |
|                                 |                                                                                                                                                                                                                                                                                                                                                                                                                                                                                                                                                                                                                                                                                            |

SCHOLARONE™  
Manuscripts



I, the Submitting Author has the right to grant and does grant on behalf of all authors of the Work (as defined in the below author licence), an exclusive licence and/or a non-exclusive licence for contributions from authors who are: i) UK Crown employees; ii) where BMJ has agreed a CC-BY licence shall apply, and/or iii) in accordance with the terms applicable for US Federal Government officers or employees acting as part of their official duties; on a worldwide, perpetual, irrevocable, royalty-free basis to BMJ Publishing Group Ltd ("BMJ") its licensees and where the relevant Journal is co-owned by BMJ to the co-owners of the Journal, to publish the Work in this journal and any other BMJ products and to exploit all rights, as set out in our [licence](#).

The Submitting Author accepts and understands that any supply made under these terms is made by BMJ to the Submitting Author unless you are acting as an employee on behalf of your employer or a postgraduate student of an affiliated institution which is paying any applicable article publishing charge ("APC") for Open Access articles. Where the Submitting Author wishes to make the Work available on an Open Access basis (and intends to pay the relevant APC), the terms of reuse of such Open Access shall be governed by a Creative Commons licence – details of these licences and which [Creative Commons](#) licence will apply to this Work are set out in our licence referred to above.

Other than as permitted in any relevant BMJ Author's Self Archiving Policies, I confirm this Work has not been accepted for publication elsewhere, is not being considered for publication elsewhere and does not duplicate material already published. I confirm all authors consent to publication of this Work and authorise the granting of this licence.

1  
2  
3  
4 Title:

5  
6 Effect of virtual reality simulation training on the response capability of  
7  
8  
9  
10 public health emergency reserve nurses in China: a quasi-experimental  
11  
12 study  
13  
14  
15  
16

17 Dandan Zhang<sup>1</sup>, Hongwu Liao<sup>2</sup>, Yitong Jia<sup>1</sup>, Wenren Yang<sup>2</sup>, Pingping He<sup>3</sup>, Dongmei Wang<sup>2</sup>,  
18  
19 Yongjun Chen<sup>2</sup>, Wei Yang<sup>2</sup>, Yin-Ping Zhang<sup>1\*</sup>

20  
21 1. *School of Nursing, Xi'an Jiaotong University Health science center, Xi'an, China*

22  
23 2. *Institute of Clinical Research, Affiliated Nanhua Hospital, University of South China,*  
24  
25 *Hengyang, China*

26  
27 3. *School of Nursing, University of South China, Hengyang, China*  
28  
29  
30

31 *§Address correspondence to:*

32  
33 Yin-Ping Zhang, PhD

34  
35 School of Nursing, Xi'an Jiaotong University Health Science Center

36  
37 No.76, Yanta West Road, Xi'an, Shaanxi, 710061, China

38  
39 Email: cathyzh@mail.xjtu.edu.cn

40  
41 Tel: +86(29) 8265 7015

42 Fax: +86(29) 8265 7015  
43  
44  
45

46 Conflict of Interest

47  
48 The authors declare that there are no conflicts of interest.  
49  
50

51  
52 The total number of words: 3367  
53  
54  
55  
56  
57  
58  
59  
60



## ABSTRACT

**Objective** To develop a virtual reality simulation training program, and further verify the effect of the program on improving the response capacity of emergency reserve nurses confronting public health emergencies.

**Design** A prospective quasi-experimental design with a control group.

**Participants** A total of 120 nurses were recruited and randomly divided into the control group and the intervention group.

**Intervention** Participants underwent a 3-month training. The control group received the conventional training of emergency response (e.g., theoretical lectures, technical skills and psychological training), while the intervention group underwent the virtual reality simulation training in combination with skills training. The COVID-19 cases were incorporated into the intervention group training. And the psychological training was identical to both groups. At the end of the training, each group conducted emergency drills twice. Before and after the intervention, the two groups were assessed for the knowledge and technical skills regarding responses to fulminate respiratory infectious diseases, as well as the capacity of emergency care. Furthermore, their pandemic preparedness was assessed with a disaster preparedness questionnaire.

**Results** After the intervention, the scores of the relevant knowledge, the capacity of emergency care, and disaster preparedness in the intervention group significantly increased ( $p<0.01$ ). The score of technical skills in the control group increased more significantly than that of the intervention group ( $p<0.01$ ). No significant difference was identified in the scores of post disaster management in two groups ( $p>0.05$ ).

**Conclusion** The virtual reality simulation training in combination with technical skills training can improve the response capacity of emergency reserve nurses as compared with the conventional training. The findings of the study provide some evidence for the emergency training of reserve nurses in better response to public

1  
2  
3  
4 health emergencies and suggest this methodology is worthy of further research and  
5  
6 popularization.  
7  
8

9  
10 **Keywords:** virtual simulation; public health emergency; reserve nurse; respiratory  
11  
12 infectious disease; COVID-19  
13  
14  
15  
16  
17  
18  
19  
20  
21  
22  
23  
24  
25  
26  
27  
28  
29  
30  
31  
32  
33  
34  
35  
36  
37  
38  
39  
40  
41  
42  
43  
44  
45  
46  
47  
48  
49  
50  
51  
52  
53  
54  
55  
56  
57  
58  
59  
60

For peer review only

### **Strengths and limitations of this study:**

- This study established a novel emergency nursing training protocol for improving the response capacity of emergency reserve nurses confronting an infectious disease epidemic or even pandemic.
- Virtual reality simulation training protocol enables nurses to quickly understand the environment and layout of the infectious department, and be familiar with the patient care process.
- An emergency reserve nursing team aiming to quickly respond to respiratory epidemic was built based on the virtual reality training, which gained relatively robust and generalisable results.
- The participants recruited from one hospital and a relatively small sample size may limit the reference value of the study.
- In the methods, virtual reality training included some nursing skills practice, so the training time of technical skills in the intervention group was reduced, however, the results showed that the training time of technical skills should be increased in the future.

## INTRODUCTION

As the virulent public health crisis, the Coronavirus disease 2019 (COVID-19) has resulted substantial deaths worldwide.<sup>1</sup> Nurses have played extremely important roles in the prevention and treatment of the COVID-19 pandemics.<sup>2</sup> During the COVID-19 pandemic, nurses are urgently called from different areas to provide help. In order to effectively respond to the respiratory infectious disease pandemic, nurses need to quickly learn the comprehensive professional knowledge and skills.<sup>3</sup> The professional training must be carried out as soon as possible so that they can quickly master the correct donning and doffing personal protection equipment (PPE),<sup>4 5</sup> the management of critically ill patients,<sup>6 7</sup> and the prevention and control of nosocomial infection, etc.<sup>6 8 9</sup>

Ideally, in order to improve preparations for pandemics, planning should be made in advance and a large number of medical staffs should be sufficiently trained.<sup>3 9</sup> Due to the abrupt, highly transmissible, and detrimental nature of acute infectious diseases, it is difficult to deliver clinical training in the real ward. Thus, training programs, e.g. emergency drills, simulation-based training, tabletop exercises, role playing, and online learning, are expected to develop and support healthcare workers to gain more experience in responding to pandemics.<sup>10-14</sup> However, the previous training programmes were commonly ineffective in reflecting the reality and providing practical experience for the recent outbreak of Covid-19. As a result, the nurses naturally lacked the ability to deal with emergencies,<sup>15-22</sup> and felt enormous psychological pressure in responding to the COVID-19 pandemic.<sup>19 20 23 24</sup>

Simulation-based training in response to epidemics has lots of advantages, e.g. providing a safe environment to train medical staff to quickly master specific technical skills, working closely with the team and optimizing work processes and systems,<sup>5 20</sup> while protecting patients from further harm.<sup>25 26</sup> In China, the virtual reality simulation programs for the respiratory infectious diseases were mainly used to

1  
2  
3  
4 train the students majoring in preventive medicine and public health<sup>27</sup> on conducting  
5 epidemic investigation, sampling, and disinfection and isolation, etc. Very few virtual  
6 reality simulation programs, covering the medical condition, treatment, and care of  
7 patients, are developed to train nurses in response to a respiratory infectious disease  
8 epidemic. Thus, this study aims to develop a virtual reality simulation training  
9 program incorporated with the COVID-19 cases, and further verify the effect of the  
10 program on improving the response capacity of emergency reserve nurses confronting  
11 public health emergencies. The highly qualified trainees are expected to build up an  
12 emergency reserve nursing team to respond to epidemic at local city or other cities  
13 after training.  
14  
15  
16  
17  
18  
19  
20  
21  
22  
23  
24  
25  
26  
27  
28  
29  
30  
31  
32  
33  
34  
35  
36  
37  
38  
39  
40  
41  
42  
43  
44  
45  
46  
47  
48  
49  
50  
51  
52  
53  
54  
55  
56  
57  
58  
59  
60

## METHODS

### *Participants*

The study was conducted at a general hospital in Hengyang, Hunan Province, China. From January to March 2020, the hospital treated 80% of the local COVID-19 confirmed patients; and by March 2, all those patients recovered and were discharged from the hospital. Since then, there has been no more newly confirmed COVID-19 case in the region. In May 2020 (two months after the stability of the local epidemic situation), 120 eligible nurses were enrolled in this study and randomly divided into control group and intervention group according to a computer-generated random numbers table. When the nurse passed the assessment after training, he/she would be selected into the emergency nurse bank of the local public health emergency.

### *Design*

This is a prospective quasi-experimental design with a control group.

### *Ethics*

This study was approved by the Ethics Committee of Affiliated Nanhua Hospital, University of South China (2020-ky-49). After signing informed consent, all participants voluntarily participated in the study and were informed they could withdraw from the study at any time without consequences. Their personal information could only be accessed by the authors.

### *Patient and Public Involvement statement*

No patients were involved in this study. This study/article focused on a novel training mode with virtual reality technology for nurses dealing with public health emergencies.

### *Training*

1  
2  
3  
4 From May to July in 2020, the nurses in the control and intervention groups were  
5 trained according to the following program.  
6

7 (1) The control group received conventional training.  
8

9 A 10-member emergency nursing instructor team was set up, consisting of the  
10 experts in medical treatment, nursing care, nosocomial infection control,  
11 psychological support, and teaching. Some of them had the experience of working on  
12 the front-line to fight against COVID-19. The instructors were responsible for  
13 teaching theories, delivering training on technical skills, and organizing emergency  
14 drills. The 3-month training had 12 sessions with 48 class hours in total (Figure.1),  
15 including theoretical lectures, individual technical skills training, psychological  
16 training, an experience sharing meeting on the medical work in the COVID-19  
17 pandemic, and emergency drill for trainees in the background of a respiratory  
18 epidemic outbreak. The instructors were divided into two groups for supervising  
19 exercise and evaluating the individual performance of each trainee in emergency drill  
20 with the emergency care capability rating scale.<sup>28</sup> As for the content of training, it  
21 included the interim clinical guidance for the management of COVID-19 patients,  
22 infection control guidance, disinfection, quarantine, psychological training, as well as  
23 the preparation of PPE. Especially, much importance was attached to the training on  
24 how to practice self-protection and relieve the nurses' psychological stress. The 14  
25 basic technical skills in the training included donning and doffing PPE, disinfection  
26 and isolation, respiratory tract sampling, cardiopulmonary resuscitation (CPR),  
27 sputum aspiration, oxygen inhalation, aerosol inhalation, tracheal intubation,  
28 mechanical ventilation, etc. The training and assessment plan is detailed in Appendix.  
29  
30  
31  
32  
33  
34  
35  
36  
37  
38  
39  
40  
41  
42  
43  
44  
45  
46  
47  
48  
49  
50

51 (2) The intervention group received virtual reality simulation training in  
52 combination with technical skills training.  
53

54 With the assistance of computer-based virtual reality equipment, there were 4  
55 steps to fulfill this project:  
56  
57  
58  
59  
60

1  
2  
3  
4 Firstly, an instructor team was set up and the training cases were prepared.  
5  
6 Different from the instructor team in the control group, the instructor team in the  
7  
8 intervention group had one specific teacher for virtual training and information  
9  
10 technology support. The instructor team was tasked with selecting three typical  
11  
12 COVID-19 cases in which the private details of the patients were removed. The three  
13  
14 cases included one severe case of an adult patient, one critical case of an elderly  
15  
16 patient with complications such as diabetes, and one critical case of an eight-year-old  
17  
18 child patient. The whole processes of treatment in those 3 cases, such as the  
19  
20 commonly used skills, nursing measures, and possible difficulties in nursing care,  
21  
22 were analyzed, identified, and factored into the cases of virtual reality simulation  
23  
24 training.

25  
26  
27 Secondly, the virtual scene was set and the platform was constructed. Four virtual  
28  
29 scenes, including pre-hospital management, fever clinics reception, intensive care  
30  
31 unit, and isolation ward, were set with the aim of familiarizing the trainees with  
32  
33 different layout of zone and working environments. Meanwhile, the cases could  
34  
35 simulate the real clinical symptoms, clinical manifestations, disease progression,  
36  
37 diagnosis and treatment, nursing care, psychological changes, the standard operating  
38  
39 procedures of disinfection and isolation, etc. The relevant tasks included all the key  
40  
41 elements of the guidance for management of patients and infection control on  
42  
43 COVID-19 (Figure.2).

44  
45  
46  
47 Thirdly, training was delivered. The training lasted 4 hours per week for 3  
48  
49 months (Figure.1). Compared with the trainees in the control group, the trainees in the  
50  
51 intervention group received both the individual and team training based on virtual  
52  
53 reality technology. Besides, the trainees were also required to attend individual  
54  
55 technical skills training. Each session was comprised of virtual reality simulation  
56  
57 training for 2 hours, the practice of technical skills on multifunctional  
58  
59 simulation/models for 1.5 hours, a recapping and exchanging of views on the  
60



1  
2  
3  
4 handling of unexpected situations or emergencies, a meeting for sharing nursing  
5  
6 experience, and a group discussion on the relevant questions and procedures to the  
7  
8 cases for 1/2 hour. The psychological training and the emergency drill at the end of  
9  
10 the training were as same as those in the control group. The trainees were allowed to  
11  
12 make appointments on the hospital virtual training platform for repeating and  
13  
14 reviewing the practices in their spare time. Each trainee can make two appointments  
15  
16 of training under a 2-instructors on-spot supervision and have 2 hours allowed for  
17  
18 each practice. The training and assessment plan is detailed in Appendix

### 21 **Evaluation**

22  
23 Main outcome: The emergency care capability rating scale: the instructors as the  
24  
25 judge were responsible for evaluating the nurses of the two groups for their capacities  
26  
27 of emergency care before and after the intervention. The design of emergency care  
28  
29 capability rating scale for nursing staff was based on the study of Wang<sup>28</sup>, which  
30  
31 focused on five dimensions with 100 points in total, including the ability of  
32  
33 occupational protection, disinfection, and quarantine (20), the observation and  
34  
35 judgment of disease (20), the preliminary examination, classification, and treatment of  
36  
37 the patients in severe or critical condition (20), cooperation and coordination (20), as  
38  
39 well as the assessment and management of crisis (20). The higher score the nurse  
40  
41 achieved, the greater the capability of the nursing staff to deal with emergencies. At  
42  
43 the end of the training, all the trainees should undergo twice drills. The capacity score  
44  
45 of emergency care was the average of the results of the twice drills.

46  
47 Before the assessment, we conducted a pilot study to assess the reliability of the scale.  
48  
49 The Cronbach's  $\alpha$  was 0.79, indicating the reliability of the scale was acceptable.

50  
51  
52  
53 Secondary outcome:

54  
55 ① Assessment of theories and skills: The trainees in the two groups were assessed for  
56  
57 their relevant theoretical knowledge and skills before and after the intervention. The  
58  
59 theoretical examination was conducted through MCQ test.<sup>29</sup> The skill assessment was  
60

1  
2  
3  
4 completed on site during the practice. Each trainee was allowed to make two attempts  
5 during the skill assessment, with the higher one achieved in the two attempts taken as  
6 the assessment result.  
7  
8

9  
10  
11 ②The Chinese version of Disaster Preparedness Evaluation Tool (DPET): this scale  
12 was used to assess the nursing staff for their preparedness for possible pandemic.  
13 Proposed by LI,<sup>30</sup> the scale was translated and adjusted culturally from Tichy's  
14 scale.<sup>31</sup> The Cronbach's  $\alpha$  coefficient was set to 0.865, involving 45 items of three  
15 dimensions: the knowledge about disaster (13 items), the skills regarding disaster (11  
16 items) and post disaster management (21 items). The scale covered risk reduction,  
17 disease prevention and health promotion, policy making and development, ethics,  
18 legal practices and liabilities, communication and information sharing, the education  
19 about and preparedness for disaster, community care, individual and home care,  
20 psychological care, the care for vulnerable groups, the long-term rehabilitation of  
21 individual, family, and community, etc., which could fully reflected the state of  
22 disaster preparedness among the nursing staff. The items were scored 1 ~ 6 points  
23 from "strongly disagree" to "strongly agree." The higher the score was, the more  
24 prepared the nursing staff were.  
25  
26  
27  
28  
29  
30  
31  
32  
33  
34  
35  
36  
37  
38  
39  
40  
41  
42

### 43 **Statistical Analysis**

44 All data were input into SPSS 18.0 and were statistical analyzed. Descriptive analysis  
45 was used to describe the demographic data. The continuous data were summarized  
46 using mean and standard deviation (SD), and categorical data were summarized using  
47 percentage. The chi-square test and Student's *t*-test were used to analyze the  
48 comparability of the baseline between the two groups. The differences before and  
49 after intervention in the results of DPET, theoretical and skill assessments, and the  
50 capacity of emergency care scores between the groups were evaluated by the  
51 Student's *t*-test. The *p*-value less than 0.05 was considered statistically significant.  
52  
53  
54  
55  
56  
57  
58  
59  
60

1  
2  
3  
4  
5  
6  
7  
8  
9  
10  
11  
12  
13  
14  
15  
16  
17  
18  
19  
20  
21  
22  
23  
24  
25  
26  
27  
28  
29  
30  
31  
32  
33  
34  
35  
36  
37  
38  
39  
40  
41  
42  
43  
44  
45  
46  
47  
48  
49  
50  
51  
52  
53  
54  
55  
56  
57  
58  
59  
60

For peer review only

## RESULTS

### (1) Demographic Data

Table 1 presents the demographic data comparison between the two groups of participants. The majority of the 120 subjects in this study were women (control group: 91.7%, intervention group: 88.3%).

The differences in gender, age, highest degree, and work experience between the two groups were not statistically significant ( $p>0.05$ ) and were comparable.

**Table 1 Demographic Data(N =120)**

| Variable                   | Control group<br>(n=60) | Intervention group<br>(n=60) | t/ $\chi^2$ | P-value |
|----------------------------|-------------------------|------------------------------|-------------|---------|
|                            | n (%)                   | n (%)                        |             |         |
| <b>Gender</b>              |                         |                              |             |         |
| Male                       | 5 (8.3)                 | 7 (11.7)                     | 0.093       | 0.761   |
| Female                     | 55 (91.7)               | 53 (88.3)                    |             |         |
| <b>Age</b>                 |                         |                              |             |         |
| ≤30 years old              | 29 (48.3)               | 28 (46.7)                    | 0.255       | 0.754   |
| 31-39 years old            | 24 (40.0)               | 24 (40.0)                    |             |         |
| ≥40 years old              | 7 (11.7)                | 8 (13.3)                     |             |         |
| <b>Clinical experience</b> |                         |                              |             |         |
| ≤5 years                   | 26 (43.3)               | 23 (38.3)                    | 0.111       | 0.912   |
| 6-14 years                 | 21 (35.0)               | 25 (41.7)                    |             |         |
| ≥15 years                  | 13 (21.7)               | 12 (20.0)                    |             |         |
| <b>Highest degree</b>      |                         |                              |             |         |
| Diploma/associate degree   | 11 (18.3)               | 10 (16.7)                    | 0.060       | 0.970   |
| Bachelor's degree          | 40 (66.7)               | 41 (68.3)                    |             |         |
| Master's degree            | 9 (15.0)                | 9 (15.0)                     |             |         |
| <b>Professional title</b>  |                         |                              |             |         |
| Primary                    | 29 (48.3)               | 29 (48.3)                    | 0.165       | 0.921   |
| Intermediate               | 21 (35.0)               | 21 (35.0)                    |             |         |
| Senior                     | 10 (16.7)               | 10 (16.7)                    |             |         |

|                                                      |           |           |       |       |
|------------------------------------------------------|-----------|-----------|-------|-------|
| Work experience in Emergency/Intensive care unit     |           |           |       |       |
| Yes                                                  | 22 (36.7) | 23 (38.3) | 0.036 | 0.850 |
| No                                                   | 38 (63.3) | 37 (61.7) |       |       |
| Work experience in infectious departments            |           |           |       |       |
| Yes                                                  | 21 (35.0) | 23 (38.3) | 0.144 | 0.705 |
| No                                                   | 39 (65.0) | 37 (61.7) |       |       |
| Experience of caring for patients with COVID-19/SARS |           |           |       |       |
| Yes                                                  | 15 (25.0) | 17 (28.3) | 0.170 | 0.680 |
| No                                                   | 45 (75.0) | 43 (71.7) |       |       |
| Hospital department of work                          |           |           |       |       |
| Medical ward                                         | 19 (31.7) | 19 (31.7) |       |       |
| Surgical ward                                        | 14 (23.3) | 15 (25.0) |       |       |
| Emergency department                                 | 8 (13.3)  | 7 (11.7)  |       |       |
| Intensive care unit                                  | 8 (13.3)  | 9 (15.0)  |       |       |
| Pediatrics department                                | 5 (8.3)   | 5 (8.3)   | 0.270 | 0.998 |
| Others                                               | 6 (10.0)  | 5 (8.3)   |       |       |

## (2) Comparison of the DPET scores between two groups before and after intervention

Prior to intervention, there was no significant difference found in the scores of disaster preparedness between the two groups ( $p>0.05$ , Table 2). After intervention, however, the total score of disaster preparedness of the intervention group was significantly higher than that of the control group ( $p<0.001$ , Table 2). The scores of knowledge and skills regarding disaster in the intervention group were significantly higher than those in the control group ( $p<0.001$ , Table 2), while the scores of post disaster management showed no statistical significance between two groups ( $p>0.05$ , Table 2).

### Table 2 Comparison of the DPET scores between groups before and after intervention (N=120)

|                              | Control group<br>(n=60)<br>(M±SD) | Intervention group<br>(n=60)<br>(M±SD) | t     | P-value          |
|------------------------------|-----------------------------------|----------------------------------------|-------|------------------|
| Knowledge regarding disaster |                                   |                                        |       |                  |
| Pre-intervention             | 101.73±17.94                      | 104.38±14.47                           | 0.891 | 0.375            |
| Post-intervention            | 122.00±12.79                      | 131.22±6.99                            | 4.900 | <b>&lt;0.001</b> |
| Skills regarding disaster    |                                   |                                        |       |                  |
| Pre-intervention             | 52.20±10.52                       | 51.55±8.72                             | 0.369 | 0.713            |
| Post-intervention            | 69.42±7.89                        | 75.95±4.52                             | 5.566 | <b>&lt;0.001</b> |
| Post disaster management     |                                   |                                        |       |                  |
| Pre-intervention             | 24.08±5.68                        | 23.82±4.68                             | 0.281 | 0.779            |
| Post-intervention            | 27.47±4.77                        | 28.05±3.26                             | 0.782 | 0.436            |
| Total score                  |                                   |                                        |       |                  |
| Pre-intervention             | 178.02±30.60                      | 179.75±20.23                           | 0.366 | 0.715            |
| Post-intervention            | 218.88±21.34                      | 235.22±10.75                           | 5.295 | <b>&lt;0.001</b> |

Bold type p values represent significant values.

SD: standard deviation, using t (t test).

### (3) Comparison of the scores of theoretical and skill assessments and the capacity of emergency care before and after intervention

There was no significant difference observed in the scores of theoretical and skill assessments or the capacity of emergency care between the two groups before intervention ( $p>0.05$ , Table 3). After intervention, however, both the score of theoretical assessment and the capacity of emergency care were improved in the two groups. The score of theoretical assessment and the capacity of emergency care in the intervention group were significantly higher than those in the control group ( $p<0.001$ , Table 3), while the score of technical skills in the control group was slightly higher than that in the intervention group ( $p<0.01$ , Table 3).

**Table 3 Comparison of the scores of theoretical and skill assessments and the capacity of emergency care between groups before and after intervention (N=120)**

|                            | Control group<br>(n=60) | Intervention group<br>(n=60) | t     | P-value           |
|----------------------------|-------------------------|------------------------------|-------|-------------------|
|                            | (M±SD)                  | (M±SD)                       |       |                   |
| Theoretical assessment     |                         |                              |       |                   |
| Pre-intervention           | 65.12±7.04              | 65.62±7.16                   | 0.386 | 0.700             |
| Post-intervention          | 82.92±4.55              | 86.62±3.91                   | 4.783 | <b>&lt;0.001</b>  |
| Technical skills           |                         |                              |       |                   |
| Pre-intervention           | 71.13±4.57              | 71.77±5.66                   | 0.035 | 0.972             |
| Post-intervention          | 90.35±3.38              | 88.47±4.19                   | 2.708 | <b>0.008</b>      |
| Capacity of emergency care |                         |                              |       |                   |
| Pre-intervention           | 63.10±7.23              | 63.93±6.65                   | 0.657 | 0.516             |
| Post-intervention          | 81.97±4.45              | 85.35±3.93                   | 4.416 | <b>&lt; 0.001</b> |

Bold type p values represent significant values.

## DISCUSSION

In this quasi-experimental study, we developed a virtual reality simulation training program that included typical COVID-19 cases and evaluated the effectiveness of a novel virtual simulation training in the reserve nurses for an infectious respiratory disease pandemic. One hundred and twenty reserve nurses, as the sample for this study, participated in the training program and completed both the pre- and post-test evaluation. All the participants were Chinese clinical nurses who volunteered to be the emergency reserve nurses for public health emergencies. The results of this study showed that the virtual simulation technology in combination with technical skills training can significantly improve the preparedness of reserve nurses for the respiratory infectious emergencies. The theoretical assessment and the emergency care capability of the intervention group were significantly increased comparing with those in the control group after conventional training ( $p < 0.001$ ). These findings indicated a critical need for virtual simulation training for the reserve nurses before they went to the front line of responding infectious respiratory disease.

Different from the conventional training, this virtual reality simulation training provided a simulated scene of the isolation ward. The training was flexible and could simulate real-world settings. Thus, it was convenient for the trainees to quickly get familiar with the special layout of zone, the working environment, and the standard procedure. These were extremely important for the emerging infectious diseases. Compared with other virtual simulation programs<sup>32-34</sup>, we integrated typical cases of COVID-19 into our training program. Since the COVID-19 has not subsided worldwide, it still is a hard and longtime work to deal with the epidemic. Thus, it is crucial important to train the technical skills, and carry out emergency drills in the background of COVID-19 for emergency reserve nurses, so as to help the trainees quickly master the essentials, adapt to the work context, improve their emergency rescue abilities. In the immersive learning environment of our program, the trainees can learn the theories and practice technical skills, which are essential to treat and



1  
2  
3  
4 care COVID-19 patients.<sup>35</sup> Moreover, this program can prevent the trainees from  
5 directly contacting COVID-19 patients, thus reducing the risk of infection and  
6 ensuring the safety of the trainees.<sup>25</sup> This virtual reality simulation training program  
7 also has the mode of team/group training, the nursing trainees can log into the system  
8 in different roles, conduct teamwork training and real-time interaction,<sup>36-39</sup> which can  
9 mobilize the trainees rapidly to collaborate with team members in completing their  
10 own tasks. Since this training program has been included as part of the virtual  
11 teaching platform operated by the hospital, the nursing trainees can make  
12 appointments for repeating and reviewing what they have learned during their spare  
13 time, which breaks the time and place limits of conventional training.  
14  
15  
16  
17  
18  
19  
20  
21  
22  
23  
24  
25

26 Several studies reported the application of virtual reality simulation training in  
27 medical/nursing training.<sup>37-40-48</sup> Leizl Joy Nayahangan, et al.<sup>9</sup> systematically reviewed  
28 the training and education of medical staff during the infectious disease epidemic, and  
29 indicated that the studies about the simulation-based training mostly focused on  
30 training practical skills related clinical procedures. Sunil S. Nair, et al.<sup>7</sup> used  
31 simulation to train ICU staff and non-critical care unit staff to familiarize themselves  
32 with the revised COVID-19 care procedures, including respiratory failure, circulatory  
33 failure, bedside ultrasound, bedside ICU procedures, and elements of  
34 COVID-19-specific care, finally found it had a good training effect. Our program was  
35 designed for reserve nurses and simulated the clinical manifestations, disease  
36 progression, psychosocial problems of COVID-19 patients, as well as diagnosis and  
37 treatment, nursing care, and standard procedures of disinfection and isolation. In our  
38 study, trainees in the intervention group received virtual reality simulation training in  
39 combination with technical skills training, which was similar to the previous study by  
40 Luca Ragazzoni et al.<sup>49</sup> They used virtual reality simulation to train medical staff on  
41 the operational public health skills related to the infection control and Ebola treatment  
42 management and also proposed a model of the virtual reality simulation in  
43 combination with hybrid skills training exercises.  
44  
45  
46  
47  
48  
49  
50  
51  
52  
53  
54  
55  
56  
57  
58  
59  
60

1  
2  
3  
4  
5  
6 After the intervention, the scores of technical skills in the control group  
7 (90.35±3.38) were slightly higher than those in the intervention group (88.47±4.19)  
8 (p<0.01), which may be explained by the two reasons: firstly, the technical skills  
9 training time of the intervention group was 4 hours less than that of the control group;  
10 secondly, the trainees got more accustomed to the traditional way of skill practice.  
11 Therefore, in the future training, the skills training time for the virtual simulation  
12 group will be added four more hours to the same level as that of the control group. It  
13 is essential that more attention should be brought to ensure the balance between  
14 virtual training and conventional training.<sup>50-52</sup> In addition, the scores of post disaster  
15 management were low among the nurses in the two groups before intervention. After  
16 intervention, however, the scores were only slightly improved in both groups, with no  
17 statistical difference between the two groups (p>0.05). This finding demonstrated that  
18 the emergency reserve nurses in the region currently lacked the knowledge of  
19 post-traumatic stress, suggesting our training program need to prioritize  
20 post-disaster care and post-traumatic recovery of the nurses in the future.  
21  
22  
23  
24  
25  
26  
27  
28  
29  
30  
31  
32  
33  
34  
35  
36

37 In the future, we will optimize our training model by integrating simulator  
38 training with that in the 3D virtual environment, so as to give full play to their  
39 respective advantage, thus improving the overall clinical capabilities of nurses.  
40 Besides, we can explore the virtual reality team training for interdisciplinary  
41 cooperation. We also hope to provide the training for other universities and hospitals  
42 based on the virtual experiment project platform in China, and even for the institutes  
43 outside of China.  
44  
45  
46  
47  
48  
49  
50  
51  
52  
53  
54  
55  
56  
57  
58  
59  
60

## Limitations

There are some limitations faced by our study. Firstly, the sample size of the study was small, as all of the participants came from the same hospital, thus restricting the reference value of the study. Secondly, due to limited resources, the virtual scene of mobile cabin hospital was not constructed in the virtual training program, which will be improved in the future study. Thirdly, the time of skills training need to be extended, as there was a lack of attention paid to the training related to post-disaster care and post-traumatic recovery, which should also be improved in the future.

## CONCLUSION

Our study has developed a virtual reality simulation training program that included typical COVID-19 cases. As for the training on the pandemic response of reserve nurses, the virtual reality simulation training in combination with technical skills training is effective in achieving better outcomes than the conventional training. This training program shows more advantages in improving the theoretical knowledge, the capacity of emergency care and the preparedness for pandemic, which makes it applicable to the emergency training for nurses in better response to public health emergencies.

1  
2  
3  
4 **Acknowledgements** We would like to thank all participants in this study and the staff  
5 from the Clinical Simulation Center in the University of South China.  
6  
7

8  
9 **Contributors** DZ and YZ designed the study. HL, PH, DW and WY helped develop  
10 the study measures and data collection. WrY and YC contributed to study delivery,  
11 interpretation of the data. DZ, YJ and YZ wrote the manuscript and all authors read  
12 the final manuscript and approved its submission.  
13  
14  
15  
16

17  
18 **Funding** This study was partially supported by the grants from Shaanxi Province  
19 (SGH140537), the Xi'an Jiaotong University Fund (202107164), the Fund of Hunan  
20 Social Science Achievement Appraisal Committee (XSP21YBC228), the Hunan  
21 Anti-COVID-19 Special Project (2020SK3040), and the fund of innovative program  
22 on the COVID-19 prevention and treatment from Hengyang Science and Technology  
23 Bureau (202010031581).  
24  
25  
26  
27  
28  
29  
30  
31

32  
33 **Data availability statement** All data relevant to the study are included in the article  
34 or uploaded as supplementary information.  
35  
36  
37  
38  
39  
40  
41  
42  
43  
44  
45  
46  
47  
48  
49  
50  
51  
52  
53  
54  
55  
56  
57  
58  
59  
60

## REFERENCES

1. Johns Hopkins Coronavirus Resource Center <https://coronavirus.jhu.edu/map.html>2020 [accessed 10, August, 2020].
2. Chen BQ, Lan BX, Zhao BZ, et al. Role of Anesthesia Nurses in the Treatment and Management of Patients With COVID-19 - ScienceDirect. *Journal of PeriAnesthesia Nursing* 2020;35(5):453-56. doi: 10.1016/j.jopan.2020.05.007
3. Li L, Xv Q, Yan J. COVID-19: the need for continuous medical education and training. *The Lancet Respiratory Medicine* 2020;8(4) doi: 10.1016/S2213-2600(20)30125-9
4. Maxwell DN, Perl TM, Cutrell JBJCID. "The Art of War" in the Era of Coronavirus Disease 2019 (COVID-19). *Clinical Infectious Diseases* 2020 doi: 10.1093/cid/ciaa229
5. Christensen L, Rasmussen CS, Benfield T, et al. A Randomized Trial of Instructor-Led Training Versus Video Lesson in Training Health Care Providers in Proper Donning and Doffing of Personal Protective Equipment. *Disaster Medicine Public Health Preparedness* 2020;14(4):514-20. doi: 10.1017/dmp.2020.56
6. Hou X, Hu W, Russell L, et al. Educational needs in the COVID-19 pandemic: a Delphi study among doctors and nurses in Wuhan, China. *BMJ Open* 2021;11(4):e045940. doi: 10.1136/bmjopen-2020-045940
7. Nair SS, Kaufman B. Simulation-Based Up-Training in Response to the COVID-19 Pandemic. *Simul Healthc* 2020;15(6):447-48. doi: 10.1097/SIH.0000000000000513 [published Online First: 2020/10/02]
8. Phua J, Weng L, Ling L, et al. Intensive care management of coronavirus disease 2019 (COVID-19): challenges and recommendations. *The Lancet Respiratory Medicine* 2020;8(5) doi: 10.1016/S2213-2600(20)30161-2
9. Nayahangan LJ, Konge L, Russell L, et al. Training and education of healthcare workers during viral epidemics: a systematic review. *BMJ Open* 2021;11(5):e044111. doi: 10.1136/bmjopen-2020-044111 [published Online First: 2021/05/30]
10. Diaz JV, Lister P, Ortiz JR, et al. Development of a severe influenza critical care curriculum and training materials for resource-limited settings. *Critical Care* 2013;17(2 Supplement) doi: 10.1186/cc12437
11. MenkinSmith L, Lehman-Huskamp K, Schaefer J, et al. A Pilot Trial of Online Simulation Training for Ebola Response Education. *Health Secur* 2018;16(6):391-401. doi: 10.1089/hs.2018.0055 [published Online First: 2018/11/30]
12. Hsu SM, Chien LJ, Tseng SH, et al. A No-Notice Drill of Hospital Preparedness in Responding to Ebola Virus Disease in Taiwan. *Health Secur* 2015;13(5):339-44. doi: 10.1089/hs.2015.0022 [published Online First: 2015/09/19]
13. Vinson E. Managing bioterrorism mass casualties in an emergency department: lessons learned from a rural community hospital disaster drill. *Disaster Manag Response* 2007;5(1):18-21. doi: 10.1016/j.dmr.2006.11.003 [published Online First: 2007/02/20]
14. Adams JJ, Lisco SJ. Ebola: Urgent Need, Rapid Response. *Simul Healthc* 2016;11(2):72-4. doi: 10.1097/SIH.0000000000000158 [published Online First: 2016/04/05]
15. Xiao-Hua XU, Sheng Y, Zhen LI, et al. A cross-sectional survey of the disaster preparedness of nurses in China. 2016

16. Jinlei BAO BS, Hui ZHANG, et al. Investigation on disaster preparedness of clinical nurses going to Wuhan to fight against epidemic diseases in Jilin province. *Chinese Nursing Research* 2020;34:938-40. doi: 10.12102/j.issn.1009-6493.2020.06.003
17. Usher K MJ, West C, et al. Cross-sectional survey of the disaster preparedness of nurses across the Asia-Pacific region. *Nurs & Health Sci* 2015;17:434-43. doi: 10.1111/nhs.12211
18. Achora S, Kamanyire JK. Disaster Preparedness: Need for inclusion in undergraduate nursing education. *Sultan Qaboos Univ Med J* 2016;16(1):e15-9. doi: 10.18295/squmj.2016.16.01.004 [published Online First: 2016/02/26]
19. Huiping WANG FZ, Weihong LIU, et al. A survey on the disaster preparedness of clinical nurses in epidemic period of novel coronavirus pneumonia. *Journal of Nursing Administration* 2020;20:229-33. doi: 10.3969/j.issn.1671-315x.2020.04.001
20. LIU Chunzi YY, LIU Huijuan, et al. Disaster preparedness of nurses in three COVID-19 designated hospitals in Beijing and its influencing factors: A cross-sectional study. *Academic Journal of Chinese PLA Medical School* 2020;41:237-41. doi: 10.3969/j.issn.2095-5227.2020.03.010
21. O'Sullivan TL, Dow D, Turner MC, et al. Disaster and emergency management: Canadian nurses' perceptions of preparedness on hospital front lines. *Prehosp Disaster Med* 2008;23(3):s11-8. [published Online First: 2008/08/16]
22. Taskiran G, Baykal, U. Nurses' Disaster Preparedness and Core Competencies in Turkey: A Descriptive Correlational Design. *Int Nurs Rev* 2019;66:165-75. doi: 10.1111/inr.12501
23. Perez-Raya F, Cobos-Serrano JL, Ayuso-Murillo D, et al. COVID-19 impact on nurses in Spain: a considered opinion survey. *Int Nurs Rev* 2021;68(2):248-55. doi: 10.1111/inr.12682 [published Online First: 2021/05/19]
24. Tosun AS, Gündodu N, Ta F. Anxiety Levels and Solution - Focused Thinking Skills of Nurses and Midwives Working in Primary Care during the COVID - 19 Pandemic: A Descriptive Correlational Study. *Journal of Nursing Management* 2021 doi: 10.1111/jonm.13334
25. Li L, Lin M, Wang X, et al. Preparing and responding to 2019 novel coronavirus with simulation and technology-enhanced learning for healthcare professionals: challenges and opportunities in China. *BMJ Simul Technol Enhanc Learn* 2020;6(4):196-98. doi: 10.1136/bmjstel-2020-000609 [published Online First: 2020/08/25]
26. Choi GYS, Wan WTP, Chan AKM, et al. Preparedness for COVID-19: in situ simulation to enhance infection control systems in the intensive care unit. *Br J Anaesth* 2020;125(2):e236-e39. doi: 10.1016/j.bja.2020.04.001 [published Online First: 2020/04/21]
27. National virtual simulation experiment teaching sharing platform experiment space: <http://www.ilab-x.com/details/v4?id=4809&isView=true>; 2019 [accessed 30, Aug 2019].
28. Wang YL, Liu YLT. The survey about the knowledge level of emergency treatment during the disasters among the emergency nurses and the countermeasures. *Chinese Journal of Practical Nursing* 2006:47-69.
29. Iqbal Z, Saleem K, Arshad HM. Measuring teachers' knowledge of student assessment: Development and validation of an MCQ test. *Educational Studies* 2020 doi: 10.1080/03055698.2020.1835615
30. Zhen LI, Sheng Y. An investigation of emergency nurses' preparedness for disasters in China. *Chinese Journal of Nursing* 2014;49:699-703.

- 1  
2  
3 31. Tichy MB, A.E. & Beckstrand, Renea & Heise, Barbara. Nurse practitioners' perception of disaster  
4 preparedness education. *American Journal for Nurse Practitioners* 2009;13:10-22.
- 5  
6 32. Najafi Ghezeljeh TMA, J. Haghani, H. et al. Effect of education using the virtual social network on  
7 the knowledge and attitude of emergency nurses of disaster preparedness: A  
8 quasi-experiment study. *Nurse Education Today* 2018;73:88-93. doi:  
9 10.1016/j.nedt.2018.12.001
- 10  
11 33. Kyaw BM, Saxena N, Posadzki P, et al. Virtual Reality for Health Professions Education: Systematic  
12 Review and Meta-Analysis by the Digital Health Education Collaboration. *J Med Internet Res*  
13 2019;21(1):e12959. doi: 10.2196/12959 [published Online First: 2019/01/23]
- 14  
15 34. Sparkes L, Chan MM, Cooper S, et al. Enhancing the management of deteriorating patients with  
16 Australian on line e-simulation software: Acceptability, transferability, and impact in Hong  
17 Kong. *Nurs Health Sci* 2016;18(3):393-9. doi: 10.1111/nhs.12282 [published Online First:  
18 2016/04/23]
- 19  
20 35. Derya Uzelli Yilmaz SHT, Yusuf Yilmaz. Nursing Education in the Era of Virtual Reality 2020.
- 21  
22 36. Labrague LJ, Hammad K, Gloe DS, et al. Disaster preparedness among nurses: a systematic review  
23 of literature. 2018;65(1)
- 24  
25 37. Khanal P VA, Ashby A, et al. Collaborative virtual reality based advanced cardiac life support  
26 training simulator using virtual reality principles. *J Biomed Inform* 2014;51:49-59. doi:  
27 10.1016/j.jbi.2014.04.005
- 28  
29 38. Youngblood P HP, Srivastava S, et al. Design, development, and evaluation Of an online virtual  
30 emergency department for training trauma teams. *Simul Healthc* 2008;3(3):146-53. doi:  
31 10.1097/SIH.0b013e31817bedf7
- 32  
33 39. Liaw SY OS, Rusli KDB , et al. Nurse-Physician Communication Team Training in Virtual Reality  
34 Versus Live Simulations: Randomized Controlled Trial on Team Communication and  
35 Teamwork Attitudes. *Journal of Medical Internet Research* 2020;22(4) doi: 10.2196/17279
- 36  
37 40. Verkuyl M, Lapum JL, St-Amant O, et al. Curricular uptake of virtual gaming simulation in nursing  
38 education. *Nurse Educ Pract* 2021;50:102967. doi: 10.1016/j.nepr.2021.102967 [published  
39 Online First: 2021/01/20]
- 40  
41 41. Harmon J, Pitt V, Summons P, et al. Use of artificial intelligence and virtual reality within clinical  
42 simulation for nursing pain education: A scoping review. *Nurse Educ Today* 2021;97:104700.  
43 doi: 10.1016/j.nedt.2020.104700 [published Online First: 2020/12/20]
- 44  
45 42. Hauze SW, Hoyt HH, Frazee JP, et al. Enhancing Nursing Education Through Affordable and  
46 Realistic Holographic Mixed Reality: The Virtual Standardized Patient for Clinical Simulation.  
47 *Adv Exp Med Biol* 2019;1120:1-13. doi: 10.1007/978-3-030-06070-1\_1 [published Online  
48 First: 2019/03/29]
- 49  
50 43. Pertile D, Gallo G, Barra F, et al. The impact of COVID-19 pandemic on surgical residency  
51 programmes in Italy: a nationwide analysis on behalf of the Italian Polyspecialistic Young  
52 Surgeons Society (SPIGC). *Updates Surg* 2020;72(2):269-80. doi:  
53 10.1007/s13304-020-00811-9 [published Online First: 2020/06/20]
- 54  
55 44. Rutherford-Hemming T, Alfes CMJCSiN. The Use of Hospital-Based Simulation in Nursing  
56 Education—A Systematic Review. 2017
- 57  
58  
59  
60



- 1  
2  
3 45. Gasteiger N, Veer SNVD, Wilson P, et al. Upskilling health and care workers with augmented and  
4 virtual reality: protocol for a realist review to develop an evidence-informed programme  
5 theory. *BMJ Open* 2021;11(7):e050033. doi: 10.1136/bmjopen-2021-050033  
6  
7 46. Abeer William VLV, Pamela John. Traditional Instruction versus Virtual Reality Simulation: A  
8 Comparative Study of Phlebotomy Training among Nursing Students in Kuwait. *Journal of*  
9 *Education and Practice* 2016;7:18-25.  
10  
11 47. Gu Y, Zou Z, Chen X. The Effects of vSIM for Nursing as a Teaching Strategy on Fundamentals of  
12 Nursing Education in Undergraduates. *Clinical Simulation in Nursing* 2017;13(4):194–97. doi:  
13 10.1016/j.ecns.2017.01.005  
14  
15 48. Christopher M. Watson M. D . MPH, Residence JMD-AMPHI, D . MCM, et al. Simulated Pediatric  
16 Resuscitation Use for Personal Protective Equipment Adherence Measurement and Training  
17 During the 2009 Influenza (H1N1) Pandemic. *The Joint Commission Journal on Quality Patient*  
18 *Safety* 2011;37(11):515-23. doi: Joint Commission Resources  
19  
20 49. Ragazzoni L, Ingrassia PL, Echeverri L, et al. Virtual Reality Simulation Training for Ebola  
21 Deployment. *Disaster Med Public Health Prep* 2015;9(5):543-6. doi: 10.1017/dmp.2015.36  
22 [published Online First: 2015/03/19]  
23  
24 50. McWilliams LA, Malecha A. Comparing Intravenous Insertion Instructional Methods with Haptic  
25 Simulators. *Nurs Res Pract* 2017;2017:4685157. doi: 10.1155/2017/4685157 [published  
26 Online First: 2017/03/03]  
27  
28 51. Jung EY, Park DK, Lee YH, et al. Evaluation of practical exercises using an intravenous simulator  
29 incorporating virtual reality and haptics device technologies. *Nurse Educ Today*  
30 2012;32(4):458-63. doi: 10.1016/j.nedt.2011.05.012 [published Online First: 2011/06/15]  
31  
32 52. Mabry J, Lee E, Roberts T, et al. Virtual Simulation to Increase Self-efficacy Through Deliberate  
33 Practice. *Nurse Educator* 2020;45(4):202-05. doi: 10.1097/nne.0000000000000758  
34  
35  
36  
37  
38  
39  
40  
41  
42  
43  
44  
45  
46  
47  
48  
49  
50  
51  
52  
53  
54  
55  
56  
57  
58  
59  
60

1  
2  
3 **Figure 1** Training plan for reserve nurses in two groups  
4  
5

6 **Figure 2** Design of virtual simulation training platform for emergency  
7 response of respiratory infectious diseases  
8  
9  
10  
11  
12  
13  
14  
15  
16  
17  
18  
19  
20  
21  
22  
23  
24  
25  
26  
27  
28  
29  
30  
31  
32  
33  
34  
35  
36  
37  
38  
39  
40  
41  
42  
43  
44  
45  
46  
47  
48  
49  
50  
51  
52  
53  
54  
55  
56  
57  
58  
59  
60

For peer review only

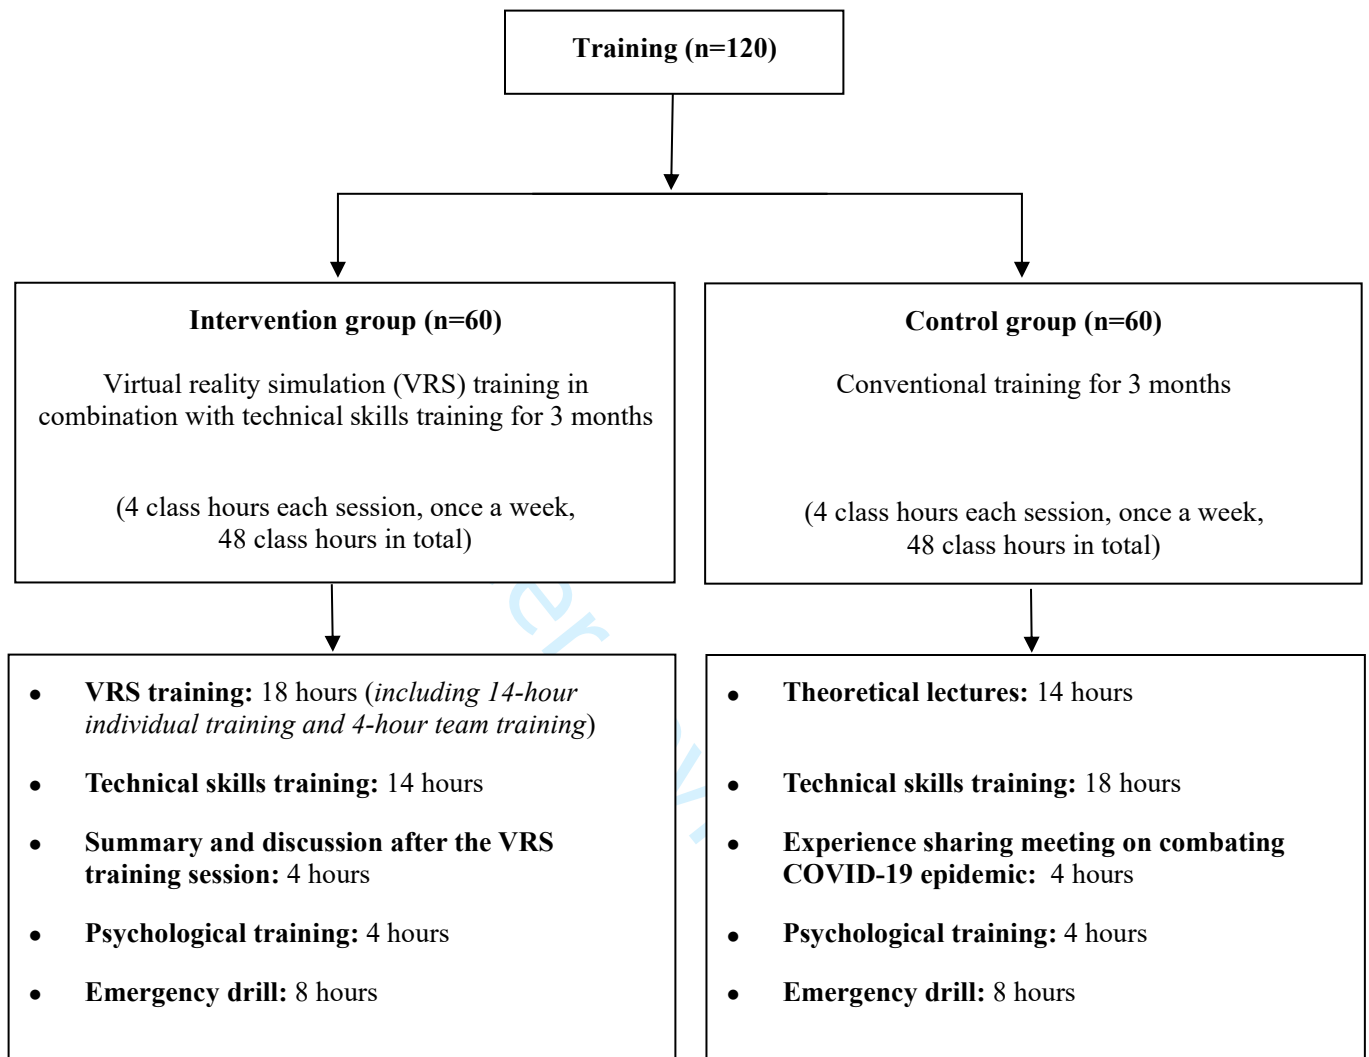

**Figure 1** Training plan for reserve nurses in two groups

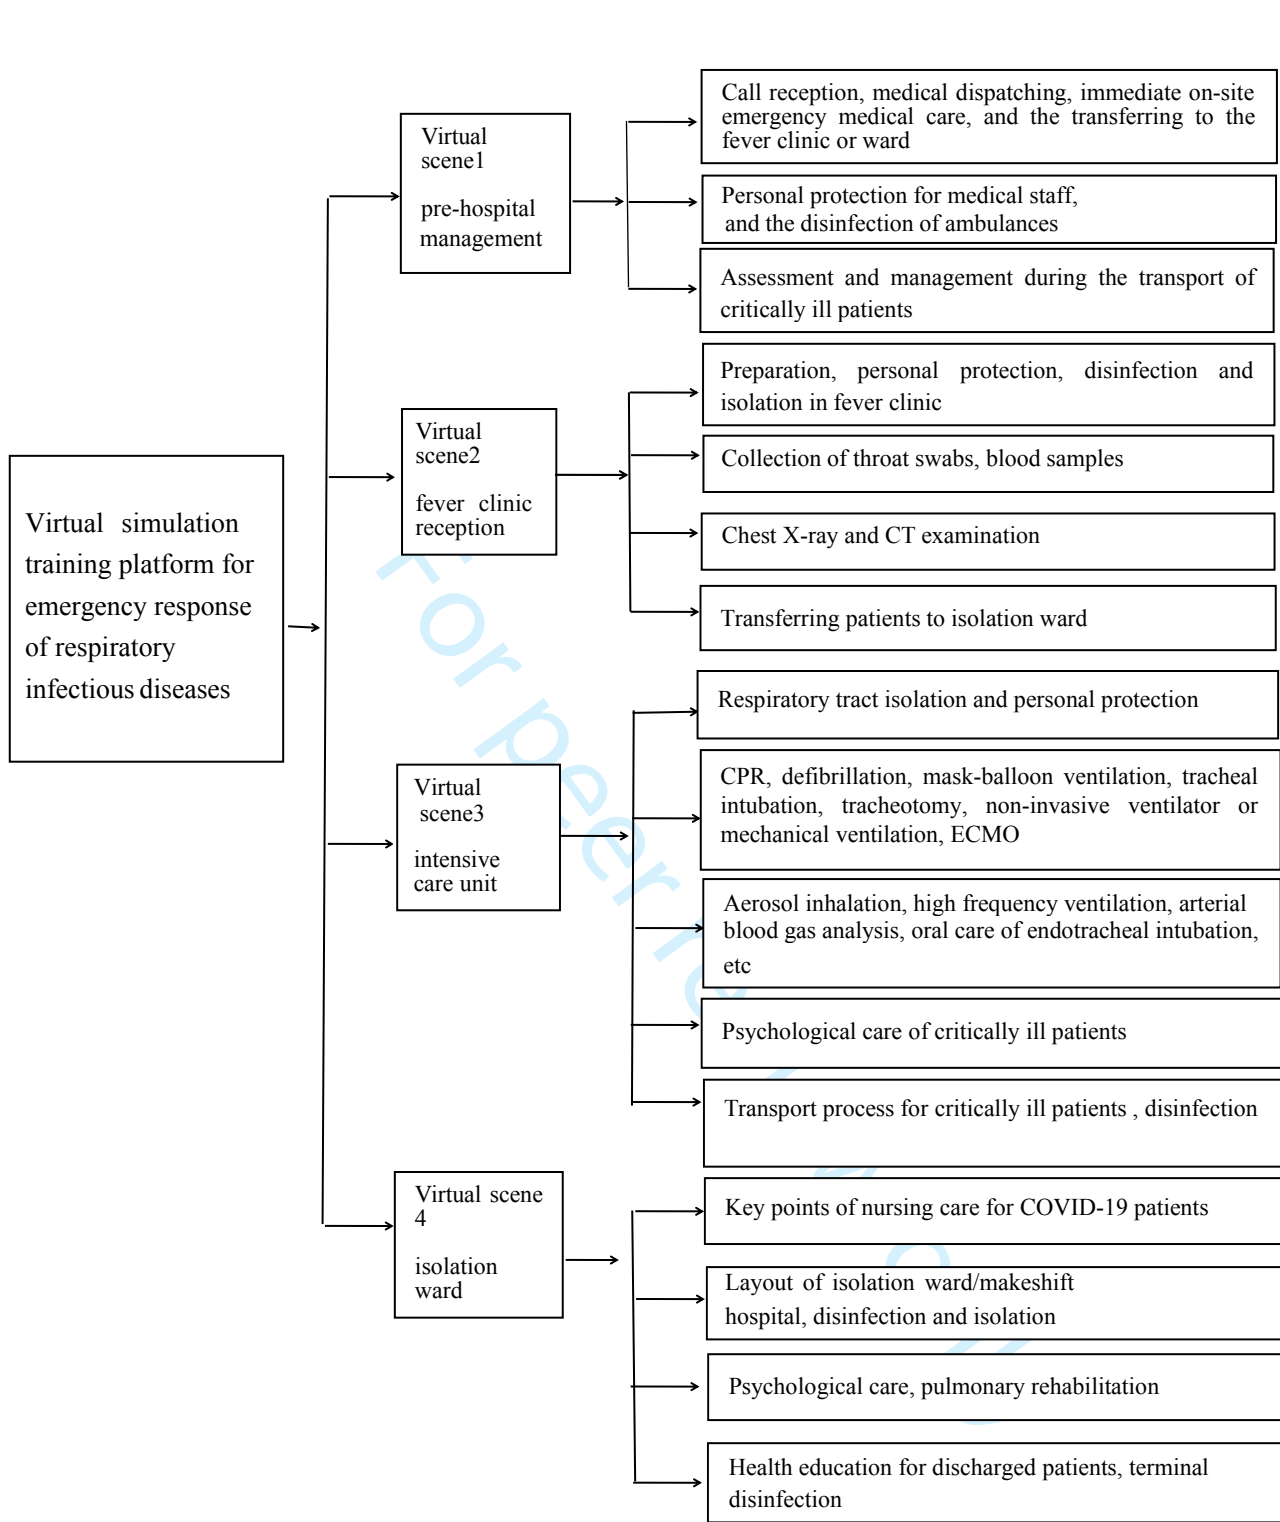

**Figure 2** Design of virtual simulation training platform for emergency response of respiratory infectious diseases

**Appendix:****The conventional training and assessment plan of the control group**

| <b>Month</b>            | Every<br>Wednesday:<br>2:00-6:00 pm | <b>Content and class hours</b>                                                                                                                                                                                                                                                                |
|-------------------------|-------------------------------------|-----------------------------------------------------------------------------------------------------------------------------------------------------------------------------------------------------------------------------------------------------------------------------------------------|
| <b>First<br/>Month</b>  | <b>Session 1</b>                    | <b>Lecture (2 h):</b> clinical guidance for the management of COVID-19 patients, infection control guidance, and the key points of nursing care<br><b>Technical skills (2 h):</b> demonstration and practice on respiratory tract sampling, donning and doffing personal protective equipment |
|                         | <b>Session 2</b>                    | <b>Lecture (2 h):</b> disinfection, quarantine, and nosocomial infection control<br><b>Technical skills (2 h):</b> review and assess the practical skills learned in the last session                                                                                                         |
|                         | <b>Session 3</b>                    | <b>Lecture (2 h):</b> guidelines for the treatment and care of the COVID-19 patients in critically condition (I)<br><b>Technical skills (2 h):</b> demonstration and practice on CPR, sputum aspiration, oxygen inhalation, simple respirator operation                                       |
|                         | <b>Session 4</b>                    | <b>Lecture (2 h):</b> guidelines for the treatment and care of the COVID-19 patients in critically condition (I)<br><b>Technical skills (2 h):</b> demonstration and practice on arterial puncture and venipuncture, trachea cannula, defibrillator operation                                 |
| <b>Second<br/>Month</b> | <b>Session 1</b>                    | <b>Lecture (2 h):</b> psychological nursing of patients<br><b>Technical skills (2 h):</b> review and assess the practical skills of CPR, sputum aspiration, oxygen inhalation, simple respirator operation                                                                                    |
|                         | <b>Session 2</b>                    | <b>Lecture (2 h):</b> nurses' psychological support, relax training, relieving stress, and releasing negative emotions<br><b>Technical skills (2 h):</b> review and assess the practical skills of arterial puncture and venipuncture, trachea cannula, defibrillator operation               |
|                         | <b>Session 3</b>                    | <b>Lecture (2 h):</b> preparation of common epidemic prevention materials, basic life support and advanced life support (I)<br><b>Technical skills (2 h):</b> practicing material preparation, high-frequency ventilation support, aerosol inhalation                                         |
|                         | <b>Session 4</b>                    | <b>Experience sharing (4 h):</b> a meeting on experience sharing with the professionals working on the front-line of treating COVID-19                                                                                                                                                        |

|                    |                  |                                                                                                                                                                                                                                                                                                                                                                                                                       |
|--------------------|------------------|-----------------------------------------------------------------------------------------------------------------------------------------------------------------------------------------------------------------------------------------------------------------------------------------------------------------------------------------------------------------------------------------------------------------------|
| <b>Third Month</b> | <b>Session 1</b> | <b>Lecture (2h):</b> basic life support and advanced life support (II)<br><b>Technical skills(2h):</b> review and assess the practical skills of high-frequency ventilation support, aerosol inhalation                                                                                                                                                                                                               |
|                    | <b>Session 2</b> | <b>Lecture (2h):</b> test on theories<br><b>Technical skills(2h):</b> demonstration and assessment of ventilators (the ICU nurse needs to attend the assessment, while others only need to learn but no test requirements)                                                                                                                                                                                            |
|                    | <b>Session 3</b> | Emergency Drill, the emergency procedures for responding to respiratory epidemic, practice and exercise in two groups after briefing the procedures and plan (3 h)<br>Recapping and exchanging of views after exercise (0.5 h)<br>Fill the scale of disaster preparedness, explain the grading criteria of the emergency response capability assessment (0.5 h)                                                       |
|                    | <b>Session 4</b> | Twice emergency response exercises for two groups (4 h): the contents of the twice exercises are the same, with 30 trainees in each. Each trainee is designated one role. In the second exercise, the trainee should play a different role. The instructors should be divided into two groups to supervise the exercise and evaluate each trainee's performance with the emergency nursing capacity evaluation sheet. |

**Virtual reality simulation (VRS) training in combination with technical skills training and assessment plan of the intervention group**

| <b>Month</b>       | Every Tuesday or Friday:<br>2:00-6:00 pm | <b>Content and class hours</b>                                                                                                                                                                                                                                                                                                |
|--------------------|------------------------------------------|-------------------------------------------------------------------------------------------------------------------------------------------------------------------------------------------------------------------------------------------------------------------------------------------------------------------------------|
| <b>First Month</b> | <b>Session 1</b>                         | <b>VRS training (2 h): Introduction and use of virtual projects,</b><br><b>Individual training: pre-hospital management</b><br><b>Technical skills (1.5 h):</b> demonstration and practice in teams on respiratory tract sampling, donning and doffing personal protective equipment<br><b>Summary and discussion (0.5 h)</b> |
|                    | <b>Session 2</b>                         | <b>VRS training (2 h):</b> Individual training on Fever Clinic Reception<br><b>Technical skills (1.5 h):</b> review and assess the practical skills learned in the last session<br><b>Summary and discussion (0.5 h)</b>                                                                                                      |
|                    | <b>Session 3</b>                         | <b>VRS training (2 h):</b> Individual training on Intensive Care Unit(I)                                                                                                                                                                                                                                                      |

|                     |                  |                                                                                                                                                                                                                                                                                                                                                                                  |
|---------------------|------------------|----------------------------------------------------------------------------------------------------------------------------------------------------------------------------------------------------------------------------------------------------------------------------------------------------------------------------------------------------------------------------------|
|                     |                  | <p><b>Technical skills (1.5h):</b> demonstration and practice on CPR, sputum aspiration, oxygen inhalation, simple respirator operation</p> <p><b>Summary and discussion (0.5 h)</b></p>                                                                                                                                                                                         |
|                     | <b>Session 4</b> | <p><b>VRS training (2 h):</b> Individual training on Intensive Care Unit (II)</p> <p><b>Technical skills (1.5 h):</b> demonstration and practice on arterial puncture and venipuncture, trachea cannula, defibrillator operation</p> <p><b>Summary and discussion (0.5 h)</b></p>                                                                                                |
| <b>Second Month</b> | <b>Session 1</b> | <p><b>VRS training (2 h):</b> Individual training on Isolation ward</p> <p><b>Technical skills (1.5h):</b> review and assess the practical skills of CPR, sputum aspiration, oxygen inhalation, simple respirator operation</p> <p><b>Summary and discussion (0.5 h)</b></p>                                                                                                     |
|                     | <b>Session 2</b> | <p><b>VRS training (2 h):</b> Comprehensive training (Individual training)</p> <p><b>Technical skills (1.5 h):</b> review and assess the practical skills of arterial puncture and venipuncture, trachea cannula, defibrillator operation</p> <p><b>Summary and discussion (0.5 h)</b></p>                                                                                       |
|                     | <b>Session 3</b> | <p><b>VRS training (2 h):</b> Comprehensive training (Team training)</p> <p><b>Technical skills (1.5 h):</b> practicing material preparation, high-frequency ventilation support, aerosol inhalation</p> <p><b>Summary and discussion (0.5 h)</b></p>                                                                                                                            |
|                     | <b>Session 4</b> | <p><b>Lecture (4 h):</b> nurses' psychological support, relax training, relieving stress, and releasing negative emotions; psychological nursing of patients</p>                                                                                                                                                                                                                 |
| <b>Third Month</b>  | <b>Session 1</b> | <p><b>VRS training (2 h):</b> Comprehensive training (Team training)</p> <p><b>Technical skills (1.5 h):</b> review and assess the practical skills of high-frequency ventilation support, aerosol inhalation</p> <p><b>Summary and discussion (0.5 h)</b></p>                                                                                                                   |
|                     | <b>Session 2</b> | <p><b>VRS training (2 h):</b> test on theories</p> <p><b>Technical skills (2 h):</b> demonstration and assessment of ventilators (the ICU nurse needs to attend the assessment, while others only need to learn but no test requirements)</p>                                                                                                                                    |
|                     | <b>Session 3</b> | <p>Emergency Drill, the emergency procedures for responding to respiratory epidemic, practice and exercise in two groups after explaining the procedures and plan (3 h)</p> <p>Recapping and exchanging of views after exercise (0.5 h)</p> <p>Fill the scale of disaster preparedness, explain the grading criteria of the emergency response capability assessment (0.5 h)</p> |
|                     | <b>Session 4</b> | <p>Twice emergency response exercise for two groups (4 h): the contents of the twice exercises are the same, with 30 trainees in</p>                                                                                                                                                                                                                                             |

1  
2  
3  
4  
5  
6  
7  
8  
9  
10  
11  
12  
13  
14  
15  
16  
17  
18  
19  
20  
21  
22  
23  
24  
25  
26  
27  
28  
29  
30  
31  
32  
33  
34  
35  
36  
37  
38  
39  
40  
41  
42  
43  
44  
45  
46  
47  
48  
49  
50  
51  
52  
53  
54  
55  
56  
57  
58  
59  
60

|  |  |                                                                                                                                                                                                                                                                                               |
|--|--|-----------------------------------------------------------------------------------------------------------------------------------------------------------------------------------------------------------------------------------------------------------------------------------------------|
|  |  | <p>each. Each trainee is designated one role. In the second exercise, the trainee should play a different role. The instructors should be divided into two groups to supervise the exercise and evaluate each trainee's performance with the emergency nursing capacity evaluation sheet.</p> |
|--|--|-----------------------------------------------------------------------------------------------------------------------------------------------------------------------------------------------------------------------------------------------------------------------------------------------|

All technical skills training in two groups were individual training.

For peer review only
