# Supplementary material for: Effect of virtual reality simulation training on the response capability of public health emergency reserve nurses in China: a quasiexperimental study
Source: PubMed Central journal article supplement — BMJ Open. 2021 Sep 22;11(9):e048611. doi: 10.1136/bmjopen-2021-048611 (PMC8460527; doi:10.1136/bmjopen-2021-048611), 2021-09-22
Supplement: bmjopen-2021-048611supp001.pdf [file bmjopen-2021-048611supp001.pdf]

**Appendix:****The conventional training and assessment plan of the control group**

| <b>Month</b>            | Every<br>Wednesday:<br>2:00-6:00 pm | <b>Content and class hours</b>                                                                                                                                                                                                                                                                |
|-------------------------|-------------------------------------|-----------------------------------------------------------------------------------------------------------------------------------------------------------------------------------------------------------------------------------------------------------------------------------------------|
| <b>First<br/>Month</b>  | <b>Session 1</b>                    | <b>Lecture (2 h):</b> clinical guidance for the management of COVID-19 patients, infection control guidance, and the key points of nursing care<br><b>Technical skills (2 h):</b> demonstration and practice on respiratory tract sampling, donning and doffing personal protective equipment |
|                         | <b>Session 2</b>                    | <b>Lecture (2 h):</b> disinfection, quarantine, and nosocomial infection control<br><b>Technical skills (2 h):</b> review and assess the practical skills learned in the last session                                                                                                         |
|                         | <b>Session 3</b>                    | <b>Lecture (2 h):</b> guidelines for the treatment and care of the COVID-19 patients in critically condition (I)<br><b>Technical skills (2 h):</b> demonstration and practice on CPR, sputum aspiration, oxygen inhalation, simple respirator operation                                       |
|                         | <b>Session 4</b>                    | <b>Lecture (2 h):</b> guidelines for the treatment and care of the COVID-19 patients in critically condition (I)<br><b>Technical skills (2 h):</b> demonstration and practice on arterial puncture and venipuncture, trachea cannula, defibrillator operation                                 |
| <b>Second<br/>Month</b> | <b>Session 1</b>                    | <b>Lecture (2 h):</b> psychological nursing of patients<br><b>Technical skills (2 h):</b> review and assess the practical skills of CPR, sputum aspiration, oxygen inhalation, simple respirator operation                                                                                    |
|                         | <b>Session 2</b>                    | <b>Lecture (2 h):</b> nurses' psychological support, relax training, relieving stress, and releasing negative emotions<br><b>Technical skills (2 h):</b> review and assess the practical skills of arterial puncture and venipuncture, trachea cannula, defibrillator operation               |
|                         | <b>Session 3</b>                    | <b>Lecture (2 h):</b> preparation of common epidemic prevention materials, basic life support and advanced life support (I)<br><b>Technical skills (2 h):</b> practicing material preparation, high-frequency ventilation support, aerosol inhalation                                         |
|                         | <b>Session 4</b>                    | <b>Experience sharing (4 h):</b> a meeting on experience sharing with the professionals working on the front-line of treating COVID-19                                                                                                                                                        |

|                    |                  |                                                                                                                                                                                                                                                                                                                                                                                                                       |
|--------------------|------------------|-----------------------------------------------------------------------------------------------------------------------------------------------------------------------------------------------------------------------------------------------------------------------------------------------------------------------------------------------------------------------------------------------------------------------|
| <b>Third Month</b> | <b>Session 1</b> | <b>Lecture (2h):</b> basic life support and advanced life support (II)<br><b>Technical skills(2h):</b> review and assess the practical skills of high-frequency ventilation support, aerosol inhalation                                                                                                                                                                                                               |
|                    | <b>Session 2</b> | <b>Lecture (2h):</b> test on theories<br><b>Technical skills(2h):</b> demonstration and assessment of ventilators (the ICU nurse needs to attend the assessment, while others only need to learn but no test requirements)                                                                                                                                                                                            |
|                    | <b>Session 3</b> | Emergency Drill, the emergency procedures for responding to respiratory epidemic, practice and exercise in two groups after briefing the procedures and plan (3 h)<br>Recapping and exchanging of views after exercise (0.5 h)<br>Fill the scale of disaster preparedness, explain the grading criteria of the emergency response capability assessment (0.5 h)                                                       |
|                    | <b>Session 4</b> | Twice emergency response exercises for two groups (4 h): the contents of the twice exercises are the same, with 30 trainees in each. Each trainee is designated one role. In the second exercise, the trainee should play a different role. The instructors should be divided into two groups to supervise the exercise and evaluate each trainee's performance with the emergency nursing capacity evaluation sheet. |

**Virtual reality simulation (VRS) training in combination with technical skills training and assessment plan of the intervention group**

| <b>Month</b>       | Every Tuesday or Friday:<br>2:00-6:00 pm | <b>Content and class hours</b>                                                                                                                                                                                                                                                                                                |
|--------------------|------------------------------------------|-------------------------------------------------------------------------------------------------------------------------------------------------------------------------------------------------------------------------------------------------------------------------------------------------------------------------------|
| <b>First Month</b> | <b>Session 1</b>                         | <b>VRS training (2 h): Introduction and use of virtual projects,</b><br><b>Individual training: pre-hospital management</b><br><b>Technical skills (1.5 h):</b> demonstration and practice in teams on respiratory tract sampling, donning and doffing personal protective equipment<br><b>Summary and discussion (0.5 h)</b> |
|                    | <b>Session 2</b>                         | <b>VRS training (2 h):</b> Individual training on Fever Clinic Reception<br><b>Technical skills (1.5 h):</b> review and assess the practical skills learned in the last session<br><b>Summary and discussion (0.5 h)</b>                                                                                                      |
|                    | <b>Session 3</b>                         | <b>VRS training (2 h):</b> Individual training on Intensive Care Unit(I)                                                                                                                                                                                                                                                      |

|                     |                  |                                                                                                                                                                                                                                                                                                                                                                                  |
|---------------------|------------------|----------------------------------------------------------------------------------------------------------------------------------------------------------------------------------------------------------------------------------------------------------------------------------------------------------------------------------------------------------------------------------|
|                     |                  | <p><b>Technical skills (1.5h):</b> demonstration and practice on CPR, sputum aspiration, oxygen inhalation, simple respirator operation</p> <p><b>Summary and discussion (0.5 h)</b></p>                                                                                                                                                                                         |
|                     | <b>Session 4</b> | <p><b>VRS training (2 h):</b> Individual training on Intensive Care Unit (II)</p> <p><b>Technical skills (1.5 h):</b> demonstration and practice on arterial puncture and venipuncture, trachea cannula, defibrillator operation</p> <p><b>Summary and discussion (0.5 h)</b></p>                                                                                                |
| <b>Second Month</b> | <b>Session 1</b> | <p><b>VRS training (2 h):</b> Individual training on Isolation ward</p> <p><b>Technical skills (1.5h):</b> review and assess the practical skills of CPR, sputum aspiration, oxygen inhalation, simple respirator operation</p> <p><b>Summary and discussion (0.5 h)</b></p>                                                                                                     |
|                     | <b>Session 2</b> | <p><b>VRS training (2 h):</b> Comprehensive training (Individual training)</p> <p><b>Technical skills (1.5 h):</b> review and assess the practical skills of arterial puncture and venipuncture, trachea cannula, defibrillator operation</p> <p><b>Summary and discussion (0.5 h)</b></p>                                                                                       |
|                     | <b>Session 3</b> | <p><b>VRS training (2 h):</b> Comprehensive training (Team training)</p> <p><b>Technical skills (1.5 h):</b> practicing material preparation, high-frequency ventilation support, aerosol inhalation</p> <p><b>Summary and discussion (0.5 h)</b></p>                                                                                                                            |
|                     | <b>Session 4</b> | <p><b>Lecture (4 h):</b> nurses' psychological support, relax training, relieving stress, and releasing negative emotions; psychological nursing of patients</p>                                                                                                                                                                                                                 |
| <b>Third Month</b>  | <b>Session 1</b> | <p><b>VRS training (2 h):</b> Comprehensive training (Team training)</p> <p><b>Technical skills (1.5 h):</b> review and assess the practical skills of high-frequency ventilation support, aerosol inhalation</p> <p><b>Summary and discussion (0.5 h)</b></p>                                                                                                                   |
|                     | <b>Session 2</b> | <p><b>VRS training (2 h):</b> test on theories</p> <p><b>Technical skills (2 h):</b> demonstration and assessment of ventilators (the ICU nurse needs to attend the assessment, while others only need to learn but no test requirements)</p>                                                                                                                                    |
|                     | <b>Session 3</b> | <p>Emergency Drill, the emergency procedures for responding to respiratory epidemic, practice and exercise in two groups after explaining the procedures and plan (3 h)</p> <p>Recapping and exchanging of views after exercise (0.5 h)</p> <p>Fill the scale of disaster preparedness, explain the grading criteria of the emergency response capability assessment (0.5 h)</p> |
|                     | <b>Session 4</b> | <p>Twice emergency response exercise for two groups (4 h): the contents of the twice exercises are the same, with 30 trainees in</p>                                                                                                                                                                                                                                             |

|  |  |                                                                                                                                                                                                                                                                                        |
|--|--|----------------------------------------------------------------------------------------------------------------------------------------------------------------------------------------------------------------------------------------------------------------------------------------|
|  |  | each. Each trainee is designated one role. In the second exercise, the trainee should play a different role. The instructors should be divided into two groups to supervise the exercise and evaluate each trainee's performance with the emergency nursing capacity evaluation sheet. |
|--|--|----------------------------------------------------------------------------------------------------------------------------------------------------------------------------------------------------------------------------------------------------------------------------------------|

All technical skills training in two groups were individual training.
